# Supplementary material
Source: Elsevier journal article supplement (https://www.sciencedirect.com/science/article/pii/S2530064418300397)
Supplement: mmc1 [file S2530064418300397:mmc1.docx]

Supporting information to the paper Baggio et al. Effects of initial disturbances and grazing regime on native grassland invasion by *Eragrostis plana* in southern Brazil


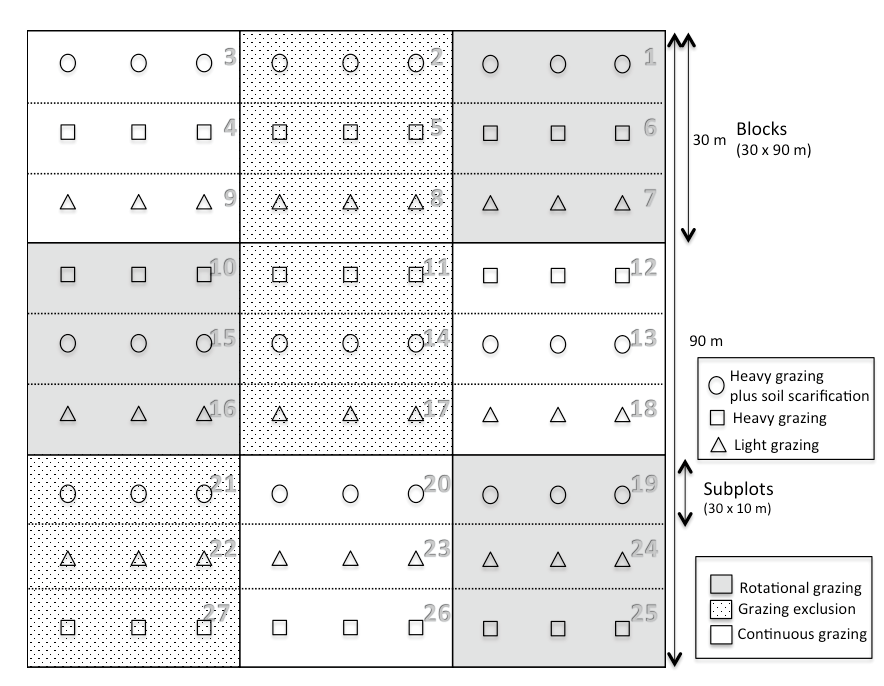


Appendix S1. Experimental design used in this work, which was a split-plot design with three complete blocks of 30 x 90 m. Management regime treatments, namely continuous grazing, rotational grazing, and grazing exclusion, were applied in the main plots of 30 x 30 m. Levels of initial disturbance, namely light grazing (triangle), heavy grazing (circle), and heavy grazing plus soil scarification (square) were applied in subplots of 30 x 10 m. The 27 subplots were the actual experimental units evaluated during the experiment, which were subsampled by three permanent quadrats of 0.5 x 0.5 m.
