# Supplementary material
Source: Elsevier journal article supplement (https://www.sciencedirect.com/science/article/pii/S2530064418300397)
Supplement: mmc2 [file S2530064418300397:mmc2.xlsx]

## Sheet: S2_baggio_et_al_data_spring_sur
Supporting information to the paper;;;;;;;;;;;;;;;;;;;;;;;;;;;;;;;;;;;;;;;;;;;;;;;;;;;;;;;;;;;;;;;;;;;;;;;;;;;;;;;;;;;;;;;;;;;;;;;;;;;;;;;;;;;;;;;;;;;;;;;;;;;;;;;;;;;;;;;;;;;;;;;;;;;;;;;;;;;;;;;;;;;;;;;;;;;;;;;;;;;;;;;;;;;;;;;;;;;;;;;;;;;;;;;;;;;;;;;;;;;;;;;;;;;;;;;;;;;;;;;;;;;;;;;;;;;;;;;;;;;;;;;;;;;;;;;;;;;;;;;;;;;;;;;;;;;;;;;;;;;;;;;;;;;;;;;;;;;;;;;;;;;;;
Baggio	R. et al. Effects of initial disturbances and grazing regime on native grassland invasion by Eragrostis plana in southern Brazil ;;;;;;;;;;;;;;;;;;;;;;;;;;;;;;;;;;;;;;;;;;;;;;;;;;;;;;;;;;;;;;;;;;;;;;;;;;;;;;;;;;;;;;;;;;;;;;;;;;;;;;;;;;;;;;;;;;;;;;;;;;;;;;;;;;;;;;;;;;;;;;;;;;;;;;;;;;;;;;;;;;;;;;;;;;;;;;;;;;;;;;;;;;;;;;;;;;;;;;;;;;;;;;;;;;;;;;;;;;;;;;;;;;;;;;;;;;;;;;;;;;;;;;;;;;;;;;;;;;;;;;;;;;;;;;…
;;;;;;;;;;;;;;;;;;;;;;;;;;;;;;;;;;;;;;;;;;;;;;;;;;;;;;;;;;;;;;;;;;;;;;;;;;;;;;;;;;;;;;;;;;;;;;;;;;;;;;;;;;;;;;;;;;;;;;;;;;;;;;;;;;;;;;;;;;;;;;;;;;;;;;;;;;;;;;;;;;;;;;;;;;;;;;;;;;;;;;;;;;;;;;;;;;;;;;;;;;;;;;;;;;;;;;;;;;;;;;;;;;;;;;;;;;;;;;;;;;;;;;;;;;;;;;;;;;;;;;;;;;;;;;;;;;;;;;;;;;;;;;;;;;;;;;;;;;;;;;;;;;;;;;;;;;;;;;;;;;;;;
;;;;;;;;;;;;;;;;;;;;;;;;;;;;;;;;;;;;;;;;;;;;;;;;;;;;;;;;;;;;;;;;;;;;;;;;;;;;;;;;;;;;;;;;;;;;;;;;;;;;;;;;;;;;;;;;;;;;;;;;;;;;;;;;;;;;;;;;;;;;;;;;;;;;;;;;;;;;;;;;;;;;;;;;;;;;;;;;;;;;;;;;;;;;;;;;;;;;;;;;;;;;;;;;;;;;;;;;;;;;;;;;;;;;;;;;;;;;;;;;;;;;;;;;;;;;;;;;;;;;;;;;;;;;;;;;;;;;;;;;;;;;;;;;;;;;;;;;;;;;;;;;;;;;;;;;;;;;;;;;;;;;;
Appendix S2. List of species sampled and their cover in experimental plots in four spring surveys.;;;;;;;;;;;;;;;;;;;;;;;;;;;;;;;;;;;;;;;;;;;;;;;;;;;;;;;;;;;;;;;;;;;;;;;;;;;;;;;;;;;;;;;;;;;;;;;;;;;;;;;;;;;;;;;;;;;;;;;;;;;;;;;;;;;;;;;;;;;;;;;;;;;;;;;;;;;;;;;;;;;;;;;;;;;;;;;;;;;;;;;;;;;;;;;;;;;;;;;;;;;;;;;;;;;;;;;;;;;;;;;;;;;;;;;;;;;;;;;;;;;;;;;;;;;;;;;;;;;;;;;;;;;;;;;;;;;;;;;;;;;;;;;;;;;;;;;;;;;;;…
;;;;;;;;;;;;;;;;;;;;;;;;;;;;;;;;;;;;;;;;;;;;;;;;;;;;;;;;;;;;;;;;;;;;;;;;;;;;;;;;;;;;;;;;;;;;;;;;;;;;;;;;;;;;;;;;;;;;;;;;;;;;;;;;;;;;;;;;;;;;;;;;;;;;;;;;;;;;;;;;;;;;;;;;;;;;;;;;;;;;;;;;;;;;;;;;;;;;;;;;;;;;;;;;;;;;;;;;;;;;;;;;;;;;;;;;;;;;;;;;;;;;;;;;;;;;;;;;;;;;;;;;;;;;;;;;;;;;;;;;;;;;;;;;;;;;;;;;;;;;;;;;;;;;;;;;;;;;;;;;;;;;;
Table 3. List of species sampled and their cover in 0.25 m2 quadrats under treatments of grazing management systems (Rot - rotational grazing	Con - continuous grazing and Exc - grazing exclusion) and levels of initial disturbance (Light - light grazing	Heavy - heavy grazing and Scar - heavy grazing plus soil scarification)	in the surveys of October 2004	November 2005	November 2006 and November 2010 (respectively 4	19	29 and 77 months after the starting of the experiment). ;;;;;;;;;;;;;;;;;;;;;;;;;;;;;;;;;;;;;;;;;;;;;;;;;;;;;;;;;;;;;;;;;;;;;;;;;;;;;;;;;;;;;;;;;;;;;;;;;;;;;;;;;;;;;;;;;;;;;;;;;;;;;;;;;;;;;;;;;;;;;;;;;;;;;;;;;;;;;;;;;;;;;;;;;;;;;;;;;;;;;;;;;;;;;;;;;;;;;;;;;;;;;;;;;;;;;;;;;;;;;;;;;;;;;;;;;;;;;;;;;;;;;;;;;;;;;;;;;;;;;;;;;;;;;;;;;;;;;;;;;;;;;;;;;;;;;;;;;;;;;;;;;;;;;;;;;;;;;;;;;;;;;
;;;;;;;;;;;;;;;;;;;;;;;;;;;;;;;;;;;;;;;;;;;;;;;;;;;;;;;;;;;;;;;;;;;;;;;;;;;;;;;;;;;;;;;;;;;;;;;;;;;;;;;;;;;;;;;;;;;;;;;;;;;;;;;;;;;;;;;;;;;;;;;;;;;;;;;;;;;;;;;;;;;;;;;;;;;;;;;;;;;;;;;;;;;;;;;;;;;;;;;;;;;;;;;;;;;;;;;;;;;;;;;;;;;;;;;;;;;;;;;;;;;;;;;;;;;;;;;;;;;;;;;;;;;;;;;;;;;;;;;;;;;;;;;;;;;;;;;;;;;;;;;;;;;;;;;;;;;;;;;;;;;;;
Survey;;;Oct04 ;Oct04 ;Oct04 ;Oct04 ;Oct04 ;Oct04 ;Oct04 ;Oct04 ;Oct04 ;Oct04 ;Oct04 ;Oct04 ;Oct04 ;Oct04 ;Oct04 ;Oct04 ;Oct04 ;Oct04 ;Oct04 ;Oct04 ;Oct04 ;Oct04 ;Oct04 ;Oct04 ;Oct04 ;Oct04 ;Oct04 ;Oct04 ;Oct04 ;Oct04 ;Oct04 ;Oct04 ;Oct04 ;Oct04 ;Oct04 ;Oct04 ;Oct04 ;Oct04 ;Oct04 ;Oct04 ;Oct04 ;Oct04 ;Oct04 ;Oct04 ;Oct04 ;Oct04 ;Oct04 ;Oct04 ;Oct04 ;Oct04 ;Oct04 ;Oct04 ;Oct04 ;Oct04 ;Oct04 ;Oct04…
Block;;;1;1;1;1;1;1;1;1;1;1;1;1;1;1;1;1;1;1;1;1;1;1;1;1;1;1;1;2;2;2;2;2;2;2;2;2;2;2;2;2;2;2;2;2;2;2;2;2;2;2;2;2;2;2;3;3;3;3;3;3;3;3;3;3;3;3;3;3;3;3;3;3;3;3;3;3;3;3;3;3;3;1;1;1;1;1;1;1;1;1;1;1;1;1;1;1;1;1;1;1;1;1;1;1;1;1;1;1;2;2;2;2;2;2;2;2;2;2;2;2;2;2;2;2;2;2;2;2;2;2;2;2;2;2;2;3;3;3;3;3;3;3;3;3;3;3;3;3;3;3;3;3;3;3;3;3;3;3;3;3;3;3;1;1;1;1;1;1;1;1;1;1;1;1;1;1;1;1;1;1;1;1;1;1;1;1;1;1;1;2;2;2;2;2;2;2…
Management system;;;Rot;Rot;Rot;Exc;Exc;Exc;Con;Con;Con;Con;Con;Con;Exc;Exc;Exc;Rot;Rot;Rot;Rot;Rot;Rot;Exc;Exc;Exc;Con;Con;Con;Con;Con;Con;Exc;Exc;Exc;Rot;Rot;Rot;Rot;Rot;Rot;Exc;Exc;Exc;Con;Con;Con;Con;Con;Con;Exc;Exc;Exc;Rot;Rot;Rot;Rot;Rot;Rot;Exc;Exc;Exc;Con;Con;Con;Con;Con;Con;Exc;Exc;Exc;Rot;Rot;Rot;Rot;Rot;Rot;Exc;Exc;Exc;Con;Con;Con;Rot;Rot;Rot;Exc;Exc;Exc;Con;Con;Con;Con;Con;Con;Exc;Exc…
Disturbance;;;Scar;Scar;Scar;Scar;Scar;Scar;Scar;Scar;Scar;Heavy;Heavy;Heavy;Heavy;Heavy;Heavy;Heavy;Heavy;Heavy;Light;Light;Light;Light;Light;Light;Light;Light;Light;Heavy;Heavy;Heavy;Heavy;Heavy;Heavy;Heavy;Heavy;Heavy;Scar;Scar;Scar;Scar;Scar;Scar;Scar;Scar;Scar;Light;Light;Light;Light;Light;Light;Light;Light;Light;Scar;Scar;Scar;Scar;Scar;Scar;Scar;Scar;Scar;Light;Light;Light;Light;Light;Ligh…
Sample unit;;;1;1;1;2;2;2;3;3;3;4;4;4;5;5;5;6;6;6;7;7;7;8;8;8;9;9;9;10;10;10;11;11;11;12;12;12;13;13;13;14;14;14;15;15;15;16;16;16;17;17;17;18;18;18;19;19;19;20;20;20;21;21;21;22;22;22;23;23;23;24;24;24;25;25;25;26;26;26;27;27;27;1;1;1;2;2;2;3;3;3;4;4;4;5;5;5;6;6;6;7;7;7;8;8;8;9;9;9;10;10;10;11;11;11;12;12;12;13;13;13;14;14;14;15;15;15;16;16;16;17;17;17;18;18;18;19;19;19;20;20;20;21;21;21;22;22;2…
Code;Species;Accepted_autho \Subsample r;1;2;3;4;5;6;7;8;9;10;11;12;13;14;15;16;17;18;19;20;21;22;23;24;25;26;27;28;29;30;31;32;33;34;35;36;37;38;39;40;41;42;43;44;45;46;47;48;49;50;51;52;53;54;55;56;57;58;59;60;61;62;63;64;65;66;67;68;69;70;71;72;73;74;75;76;77;78;79;80;81;1;2;3;4;5;6;7;8;9;10;11;12;13;14;15;16;17;18;19;20;21;22;23;24;25;26;27;28;29;30;31;32;33;34;35;36;37;38;39;40;41;42;43;44;4…
acbe;Acmella bellidioides;(Smith in Rees) R.K. Jansen;0;0;0;0;0;0;0;0;0;0;0;0;0;0;0;0;0;0;0;0;0;0;0;0;0;0;0;0;0;0;0;0;0;0;0;0;0;0;0;0;0;0;0;0;0;0;0;0;0;0;0;0;0;0;0;0;0;0;0;0;0;0;0;0;0;0;0;0;0;0;0;0;0;0;0;0;0;0;0;0;0;0;0;0;0;0;0;0;0;0;0;0;0.37;0;0;0;0;0;0;0;0;0;0;0.025;0;0.01;0;0;0.025;0;0;0;0;0;0;0;0;0;0;0;0;0;0;0;0;0;0;0;0;0;0;0;0;0;0;0;0;0;0;0.025;0;0;0;0;0;0;0;0;0;0;0.025;0;0;0;0.01;0;0;0.37;0…
agmo;Agrostis montevidensis;Spreng. ex Nees;0;0;0;0;0;0;0;0;0;0;0;0;0;0;0;0;0;0;0;0;0;0;0;0;0;0;0;0;0;0;0;0;0;0;0;0;0;0;0;0;0;0;0;0;0;0;0;0;0;0;0;0;0;0;0;0;0;0;0;0;0;0;0;0;0;0;0;0;0;0;0;0;0;0;0;0;0;0;0;0;0;0;0;0;0;0;0.01;0;0;0;0;0;0;0;0;0;0;0;0;0;0;0;0;0;0;0;0;0;0;0;0;0;0;0;0;0.15;0;0;0;0;0;0;0;0;0;0;0;0;0;0;0;0;0;0;0;0;0;0;0;0;0;0;0;0;0;0;0;0;0;0;0;0;0;0;0;0;0;0;0;0;0;0;0.025;0;0;0;0;0;0;0;0;0.0…
anar;Anagallis arvensis;L.;0;0;0;0;0;0;0;0;0;0;0;0;0;0;0;0;0;0;0;0;0;0;0;0;0;0;0;0;0;0;0;0;0;0;0;0;0;0;0;0;0;0;0;0;0;0;0;0;0;0;0;0;0;0;0;0;0;0;0;0;0;0;0;0;0;0;0;0;0;0;0;0;0;0;0;0;0;0;0;0;0;0;0;0;0;0;0;0;0;0;0;0;0;0;0;0;0.01;0;0.01;0;0;0;0;0;0;0;0;0;0;0;0;0;0;0;0;0;0;0;0;0;0;0;0;0;0;0;0;0;0;0;0;0;0;0;0;0;0.025;0;0;0;0;0;0;0;0;0;0;0;0;0;0;0;0;0;0;0;0;0;0;0;0;0;0.01;0;0;0;0;0;0.025;0;0;0;0;0;0;0;0;0…
anmi;Anagallis minima;(L.) E.H.L. Krause;0;0.025;0.37;0.025;0.025;0;0.15;0.15;0.15;0;0;0;0;0;0;0;0;0;0;0;0;0;0;0;0;0;0;0;0;0;0;0;0;0;0;0;0;0;0.025;0.025;0;0;0.37;0.025;0.025;0;0;0;0;0.01;0;0;0;0;0.15;0.025;0.025;0;0.01;0;0.025;0.025;0;0;0;0;0;0;0;0;0;0;0;0;0;0;0;0;0;0;0;0;0;0;0;0;0;0;0;0;0;0;0;0;0;0;0;0;0;0;0;0;0;0;0;0;0;0;0;0;0;0;0;0;0;0;0;0;0;0;0;0;0;0;0;0;0;0;0;0;0;0;0;0;0;0;0;0;0;0;0;0;0;0;0;…
anter;Andropogon ternatus;(Spreng.) Nees;0;0;0;0;0;0;0;0;0;0;0;0;0;0;0;0;0;0;0;0;0;0;0;0;0;0;0;0;0;0;0;0;0;0;0;0;0;0;0;0;0;0;0;0;0;0;0;0;0;0;0;0;0;0;0;0;0;0;0;0;0;0;0;0;0;0;0;0;0;0;0;0;0;0;0;0;0;0;0;0;0;0;0;0;0;0;0;0;0;0;0;0;0;0;0;0;0;0;0;0;0;0;0;0;0;0;0;0;0;0;0;0;0;0;0;0;0;0;0;0;0;0;0;0;0;0;0;0;0;0;0;0;0;0;0;0;0;0;0;0;0;0;0;0;0;0;0;0;0;0;0;0;0;0;0;0;0;0;0;0;0;0;0;0;0;0;0;0;0;0;0;0;0;0;0;0;0;0;0;…
asmo;Aspilia montevidensis;(Spreng.) Kuntze;0;0;0;0;0;0;0;0;0;0;0;0;0;0;0;0;0;0;0;0;0;0;0;0;0;0;0;0;0;0;0;0;0;0.025;0;0;0;0;0;0;0;0;0.15;0.025;0;0.01;0.37;0;0;0;0;0;0;0;0;0;0;0;0;0;0.37;0;0.025;0;0.37;0;0;0;0.01;0;0.01;0.01;0;0.035;0.01;0.025;0.16;0.02;0.37;0.175;0.025;0.01;0;0;0;0.025;0;0.025;0;0;0;0.025;0;0;0.025;0.025;0.01;0.15;0.025;0;0.15;0.01;0.025;0.025;0;0.025;0;0;0.15;0.025;0.025;0.025;0…
axfi;Axonopus fissifolius;(Raddi) Kuhlm.;0.15;0;0.025;0;0.025;0;0;0;0.15;0.37;0;0.15;0;0.37;0;0.15;0.62;0.15;0;0;0.025;0;0;0;0;0;0;0.01;0.62;0.15;0.37;0;0.01;0;0;0;0;0.025;0.025;0;0;0.15;0;0;0;0.025;0.025;0;0;0.15;0.37;0.15;0.15;0.025;0.15;0;0.15;0;0;0.15;0;0.025;0;0;0.025;0;0.025;0.62;0.37;0.15;0.37;0;0.37;0;0;0.01;0;0.025;0;0.025;0.01;0;0;0;0;0;0;0;0;0;0;0;0.025;0;0;0;0;0;0;0;0;0;0;0;0;0;0;0;0;…
baco;Baccharis coridifolia;DC.;0;0;0;0;0;0;0;0;0;0;0;0;0;0;0;0;0;0;0;0;0;0;0.025;0.025;0;0;0;0;0;0;0;0.15;0;0;0;0;0;0;0;0;0;0;0;0;0;0.15;0.025;0;0;0;0;0;0;0;0;0;0;0;0;0;0;0;0;0;0;0.025;0;0;0;0;0;0;0;0;0;0;0;0;0;0;0;0;0;0;0;0;0;0;0;0;0;0;0;0;0;0;0;0;0;0;0;0;0;0;0;0;0;0;0;0;0;0;0;0;0;0;0;0;0;0;0;0;0;0;0;0;0.025;0;0;0;0;0;0;0;0;0;0;0;0;0;0;0;0;0;0;0;0;0;0;0;0;0;0;0;0;0;0;0;0;0;0;0;0;0;0;0;0;0;0;0;0;…
bage;Baccharis genistelloides;(Lam.) Pers.;0;0;0;0;0;0;0;0;0;0;0;0;0;0.01;0;0;0;0;0;0;0;0;0;0;0;0;0;0;0.025;0;0;0;0;0;0;0;0;0;0;0;0;0;0;0;0;0;0.01;0;0;0;0;0;0;0;0;0;0;0;0;0;0;0.025;0;0;0.01;0;0;0;0;0;0;0;0;0;0;0;0;0;0;0;0;0;0;0;0;0;0;0;0;0;0;0;0;0;0;0;0;0;0;0;0;0;0;0;0;0;0;0;0;0;0;0;0;0;0;0;0;0;0;0;0;0;0;0;0;0;0;0;0;0;0;0;0;0;0;0;0;0;0;0;0;0;0.025;0;0;0.025;0;0;0;0;0;0;0;0;0;0;0;0;0;0;0;0;0;0;0;0…
boda;Borreria dasycephala;(Cham. & Schltdl.) Bacigalupo & E.L. Cabral;0;0;0;0;0;0;0;0;0;0;0;0;0;0;0;0;0;0;0;0;0;0;0;0;0;0;0;0;0;0;0;0;0;0;0;0;0;0;0;0;0;0;0;0;0;0;0;0;0;0;0;0;0;0;0;0;0;0;0;0;0;0;0;0;0;0;0;0;0;0;0;0;0;0;0;0;0;0;0;0;0;0;0;0;0;0;0;0;0;0;0;0;0;0;0;0;0;0;0;0;0;0;0;0;0;0;0;0;0;0;0;0;0;0;0;0;0;0;0;0;0;0;0;0;0;0;0;0;0;0;0;0;0;0;0;0;0;0;0;0;0;0;0;0;0;0;0;0;0;0;0;0;0;0;0;0;0;0;0;0;0;0;0;0;0…
bola;Bothriochloa laguroides;(DC.) Herter;0;0;0;0;0;0;0;0;0;0;0.15;0.37;0;0.37;0.37;0;0.15;0.15;0;0;0;0.37;0;0;0;0;0;0;0;0.025;0.15;0.62;0.37;0;0.37;0;0;0;0;0;0;0;0;0;0;0;0.01;0.37;0;0;0;0;0;0;0;0;0;0;0;0;0;0.025;0;0;0;0.025;0;0;0;0;0;0;0;0;0;0.15;0.87;0.37;0.01;0.15;0.37;0;0;0.01;0;0;0;0;0;0;0.15;0.025;0;0;0;0;0.15;0.15;0.15;0.37;0.025;0.15;0.025;0;0.025;0;0.025;0;0;0;0;0;0;0.15;0.37;0;0;0;0.025…
boin;Bowlesia incana;Ruiz & Pav.;0;0;0;0;0;0;0;0;0;0;0;0;0;0;0;0;0;0;0;0;0;0;0;0;0;0;0;0;0;0;0;0;0;0;0;0;0;0;0;0;0;0;0;0;0;0;0;0;0;0;0;0;0;0;0;0;0;0;0;0;0;0;0;0;0;0;0;0;0;0;0;0;0;0;0;0;0;0;0;0;0;0;0;0;0;0;0;0;0;0;0;0;0;0;0;0;0;0;0;0;0;0;0;0;0;0;0;0;0;0;0;0;0;0;0;0;0;0;0;0;0;0;0;0;0;0;0;0;0;0;0;0;0;0;0;0;0;0;0;0;0;0;0;0;0;0;0;0;0;0;0;0;0;0;0;0;0;0;0;0;0;0;0;0;0;0;0;0;0;0;0;0;0;0;0;0;0;0;0;0;0;0;0;…
brmi;Briza minor;L.;0;0;0;0;0;0;0;0;0;0.01;0;0;0;0;0;0;0;0;0;0;0;0;0;0;0;0.025;0;0.15;0;0;0.025;0.025;0.025;0.37;0;0.37;0.025;0;0;0;0.01;0;0;0;0;0.025;0;0.37;0.62;0;0;0.025;0.15;0.025;0;0;0;0;0.01;0;0;0;0;0;0.025;0;0.01;0;0;0.025;0;0;0;0;0.15;0.15;0.01;0;0;0.025;0;0.01;0;0.025;0;0;0;0;0;0;0;0;0.025;0;0;0;0.15;0.15;0;0;0;0.025;0;0;0;0;0.025;0;0.025;0;0;0;0;0;0.025;0;0;0;0;0.025;0;0.025;0.15;0;0;0.…
brsp;Briza sp;;0;0;0;0;0;0;0;0;0;0;0;0;0;0;0.37;0;0;0.15;0.37;0;0;0.025;0.37;0.15;0;0;0;0;0;0;0;0;0;0;0;0;0;0;0;0;0;0;0;0;0;0;0;0;0;0;0;0;0;0;0;0;0;0;0;0;0;0;0;0;0;0;0;0;0;0;0;0;0;0;0;0;0;0;0;0;0;0;0;0;0;0;0;0;0;0;0;0;0;0;0;0;0;0;0;0;0;0;0;0;0;0;0;0;0;0;0;0;0;0;0;0;0;0;0;0;0;0;0;0;0;0;0;0;0;0;0;0;0;0;0;0;0;0;0;0;0;0;0;0;0;0;0;0;0;0;0;0;0;0;0;0;0;0;0;0;0;0;0;0;0;0;0;0;0;0;0;0;0;0;0;0;0;0;0;0;0;0;0…
chsu;Chascolytrum subaristatum;(Lam.) Desv.;0;0;0;0;0;0;0;0;0;0;0;0;0;0;0;0;0;0;0;0;0;0;0;0;0;0.37;0;0;0;0;0;0;0;0;0;0;0;0;0;0;0;0;0;0;0;0;0;0;0;0;0;0;0;0.37;0;0;0;0;0;0;0;0;0;0;0;0;0;0;0;0;0;0;0;0;0;0;0.15;0;0;0;0;0;0;0;0.15;0.15;0;0;0;0;0;0;0;0;0;0.37;0;0;0;0.37;0;0;0.025;0;0;0.025;0.025;0;0;0;0;0;0;0;0.01;0;0;0;0;0;0.025;0;0;0;0;0;0;0;0.025;0;0.15;0;0;0;0;0;0;0;0;0;0;0;0;0;0.025;0;0;0;0;0;0;0;…
cavi;Calamagrostis viridiflavescens var. montevidensis;(Nees) K_mpf;0;0;0;0;0;0;0;0;0;0;0;0;0;0;0;0;0;0;0;0.01;0;0;0.15;0.15;0;0;0;0;0;0;0.025;0.025;0;0;0;0;0;0;0;0;0;0;0;0;0;0;0.15;0;0;0;0;0;0.025;0.37;0;0;0;0;0;0;0;0;0;0.025;0;0.025;0.15;0.37;0;0;0.15;0.025;0;0;0;0;0;0;0.025;0;0;0;0;0;0;0;0;0;0;0;0;0;0;0;0;0;0;0;0;0;0;0;0.025;0;0;0;0;0;0;0;0;0;0;0;0;0;0.025;0;0;0;0;0;0;0;0;0;0;0;0;0.025;0;0;0;0…
casp;Cardamine sp;;0;0;0;0;0;0;0;0;0;0;0;0;0;0;0;0;0;0;0;0;0;0;0;0;0;0;0;0;0;0;0;0;0;0;0;0;0;0;0;0;0;0;0;0;0;0;0;0;0;0;0;0;0;0;0;0;0;0;0;0;0;0;0;0;0;0;0;0;0;0;0;0;0;0;0;0;0;0;0;0;0;0;0;0;0;0;0;0;0;0;0;0;0;0;0;0;0;0;0;0;0;0;0;0;0;0;0;0;0;0;0;0;0;0;0;0;0.01;0;0;0;0;0;0;0;0;0;0;0;0;0;0;0;0;0;0;0;0;0;0;0;0;0;0;0;0;0;0;0;0;0;0;0;0;0;0;0;0;0;0;0;0;0;0;0;0;0;0;0;0;0;0;0;0;0;0;0;0;0;0;0;0;0;0;0;0;0;0;0;0…
caal;Carex albolutescens;Schwein.;0;0;0;0;0;0;0;0;0;0;0;0.025;0.025;0;0;0;0;0;0;0;0;0;0;0;0;0;0;0;0;0;0;0;0;0;0;0;0;0;0;0;0;0;0;0;0;0;0;0;0;0;0;0;0;0;0;0;0;0;0;0;0;0;0;0;0;0;0;0;0;0;0;0;0;0;0;0;0;0;0;0;0;0;0;0;0;0;0;0;0;0;0;0;0;0;0;0;0;0;0;0;0;0;0;0;0;0;0;0;0;0;0;0;0;0;0;0;0;0;0;0;0;0;0;0;0;0;0;0;0;0;0;0;0;0;0;0;0;0;0;0;0;0;0;0;0;0;0;0;0;0;0;0;0;0;0;0;0;0;0;0;0;0;0;0;0;0;0;0;0;0;0;0;0;0;0;0;0;0;0…
cabo;Carex bonariensis;Desf. ex Poir.;0;0;0;0;0;0;0;0;0;0;0;0;0;0;0;0;0;0;0;0;0;0;0;0;0;0;0;0;0;0;0;0;0;0;0;0;0;0;0;0;0;0;0;0;0;0;0;0;0;0;0;0;0;0;0;0;0;0;0;0;0;0;0;0;0;0;0;0;0;0;0;0;0;0;0;0;0;0;0;0;0;0;0;0;0;0;0;0;0;0;0;0;0;0;0;0;0;0;0;0;0;0;0;0;0;0;0;0;0;0;0;0;0;0;0;0;0;0;0;0;0;0;0;0;0;0;0;0;0;0;0;0;0;0;0;0;0;0;0;0;0;0;0;0;0;0;0;0;0;0;0;0;0;0;0;0;0;0;0;0;0;0;0;0;0;0;0;0;0;0;0.025;0;0;0;0;0;0;0;0…
caph;Carex phalaroides;Kunth;0;0;0;0;0;0;0;0;0;0;0.15;0;0.025;0;0;0;0;0;0;0;0.025;0;0;0;0.025;0;0;0;0;0;0;0;0;0;0;0;0;0;0;0;0;0;0;0;0;0;0;0;0;0;0.15;0.025;0;0;0.025;0;0;0;0;0;0;0;0;0;0;0;0;0;0;0;0;0;0;0;0;0;0;0;0;0;0;0;0;0;0;0;0;0.025;0;0.025;0.025;0;0;0;0;0.025;0;0;0;0;0;0;0;0.025;0;0;0.025;0;0;0;0;0;0;0.025;0;0;0.025;0;0;0;0;0;0.025;0;0;0;0;0;0;0.025;0;0;0;0;0.025;0;0;0;0;0;0;0;0;0;0;0;0;0;0;0;…
caso;Carex sororia;Kunth;0;0;0;0;0;0;0;0;0;0;0;0;0;0;0;0;0;0;0;0;0;0;0;0;0;0;0;0;0;0;0;0;0;0;0;0;0;0;0;0;0;0;0;0;0;0;0;0;0;0;0;0;0;0;0;0;0;0;0;0;0;0;0;0;0;0;0;0;0;0;0;0;0;0;0;0;0;0;0;0;0;0;0;0;0;0;0;0;0;0;0;0;0;0;0;0;0;0;0;0;0.01;0.01;0;0;0;0;0;0;0;0;0;0;0;0;0;0;0;0;0;0;0;0;0;0;0;0;0;0;0;0;0;0;0;0;0;0;0;0;0;0;0;0;0;0;0;0;0;0;0;0;0;0;0.025;0;0;0;0;0;0;0;0;0;0;0;0;0;0;0;0;0;0;0;0;0;0;0;0;0;0;0;0;0;…
casp;Carex sp.;;0;0;0;0;0;0;0;0;0;0;0;0;0;0;0;0;0;0;0;0;0;0;0;0;0;0;0;0;0;0;0;0;0;0;0;0;0;0;0;0;0;0;0;0;0;0;0;0;0;0;0;0;0;0;0;0;0;0;0;0;0;0;0;0;0;0;0;0;0;0;0;0;0;0;0;0;0;0;0;0;0;0;0;0;0;0;0;0;0;0;0;0;0;0;0;0;0;0;0;0;0;0;0;0;0;0;0;0;0;0;0;0;0;0;0;0;0;0;0;0;0;0;0;0;0;0;0;0;0;0;0;0;0;0;0;0;0;0;0;0;0;0;0;0;0;0;0;0;0;0;0;0;0;0;0;0;0;0;0;0;0;0;0;0;0;0;0;0;0;0;0;0;0;0;0;0;0;0;0;0;0;0;0;0;0;0;0;0;0;0;0;0…
cehu;Cerastium humifusum;Cambess. ex A. St.-Hil.;0;0;0;0;0;0;0;0;0;0;0;0;0;0;0;0;0;0;0;0;0;0;0;0;0;0;0;0;0;0;0;0;0;0;0;0;0;0;0;0;0;0;0;0;0;0;0;0;0;0;0;0;0;0;0;0;0;0;0;0;0;0;0;0;0;0;0;0;0;0;0;0;0;0;0;0;0;0;0;0;0;0;0;0;0;0;0;0;0;0;0;0;0;0;0;0;0.01;0;0.01;0;0;0;0;0;0;0;0;0;0;0;0;0;0;0;0;0;0;0;0;0;0;0;0;0;0;0;0;0;0;0;0;0;0;0;0;0;0;0;0;0;0;0;0;0;0;0;0;0;0;0;0.025;0;0;0;0;0;0;0;0;0;0;0;0;0;0;0;0;0;0;0;…
chru;Chaptalia runcinata;Kunth;0;0;0;0;0;0;0;0;0;0;0;0;0;0;0;0;0;0;0;0;0;0;0;0;0;0;0;0;0;0;0;0;0;0;0;0;0;0;0;0;0;0;0;0;0;0;0;0;0;0;0;0;0;0;0;0;0;0;0;0;0;0;0;0;0;0;0;0;0;0;0;0;0;0;0;0;0;0;0.01;0.025;0;0;0;0;0;0;0;0;0;0;0;0;0;0;0;0;0;0.01;0;0;0;0;0;0;0;0;0;0;0;0;0;0;0;0;0;0;0;0;0;0;0;0;0;0;0;0;0;0;0;0;0;0;0;0.025;0;0;0;0;0;0;0;0;0;0;0;0;0;0;0;0;0;0;0;0;0;0;0;0;0;0;0;0;0;0.025;0;0;0;0;0;0;0;0;0;0;0;…
chac;Chevreulia acuminata;Less.;0;0;0;0;0;0;0;0;0;0;0;0;0;0.025;0.15;0.01;0;0.025;0.01;0;0.01;0.025;0;0;0;0;0;0;0.01;0;0;0;0;0;0;0;0;0;0;0;0;0;0;0;0;0;0;0;0.01;0;0;0;0;0;0;0;0;0;0;0;0;0;0;0;0;0;0;0;0;0;0;0;0.01;0;0.01;0;0;0;0;0;0;0;0;0;0;0;0;0;0;0;0;0;0;0;0;0;0;0;0;0;0;0;0;0;0;0;0;0;0;0;0;0;0;0;0.025;0;0;0;0;0;0;0;0;0;0;0;0;0;0;0;0;0;0;0;0;0;0;0.025;0.025;0;0;0;0;0;0;0;0;0;0;0;0;0;0;0.025;0;0;0;0…
coer;Commelina erecta;L.;0;0;0;0;0;0;0;0;0;0;0;0;0;0;0;0;0;0;0;0;0;0;0;0;0;0;0;0;0;0;0;0;0;0;0;0;0;0;0;0;0;0;0;0;0;0;0;0;0;0;0;0;0;0;0;0;0;0;0;0;0;0;0;0;0;0;0;0;0;0;0;0;0;0;0;0;0;0;0;0;0;0;0;0;0;0;0;0;0;0;0.01;0;0;0;0;0;0;0;0;0;0;0;0;0;0;0;0;0;0;0;0;0;0;0;0;0;0;0;0;0;0;0;0;0;0;0;0;0;0;0;0;0;0;0;0;0;0;0;0;0;0;0;0;0;0;0;0;0;0;0;0;0;0;0;0;0;0;0;0;0;0;0.025;0;0;0;0;0;0;0;0;0;0;0;0;0;0;0;0;0;0;0;0;0;0…
cobo;Conyza bonariensis;(L.) Cronquist;0;0;0;0;0;0;0;0;0;0;0;0;0;0;0;0;0;0;0;0;0;0;0;0;0;0;0;0;0;0;0;0;0;0;0;0;0;0;0;0;0;0;0;0;0;0;0;0;0;0;0;0;0;0;0;0;0;0;0;0;0;0;0;0;0;0;0;0;0;0;0;0;0;0;0;0;0;0;0;0;0;0;0;0;0;0;0;0;0;0;0;0;0;0;0;0;0;0;0;0;0;0;0;0;0;0;0;0;0.025;0;0;0;0;0;0;0;0;0;0;0;0;0;0;0;0;0;0;0;0.01;0;0;0;0;0;0;0;0;0;0;0;0;0;0;0;0;0;0;0;0;0;0;0;0;0;0;0;0;0;0;0;0;0;0;0;0;0;0;0;0;0;0;0;0;0;0;0;0…
copr;Conyza primulifolia;(Lam.) Cuatrec. & Lourteig;0;0;0;0;0;0;0;0;0;0;0;0;0;0;0;0;0;0;0;0;0;0;0;0;0;0;0;0;0;0;0;0;0;0;0;0;0;0;0;0;0;0;0;0;0;0;0;0;0;0;0;0;0;0;0;0;0;0;0;0;0;0;0;0;0;0;0;0;0;0;0;0;0;0;0;0;0;0;0;0;0;0;0;0;0;0;0;0;0;0;0;0;0;0;0;0;0;0;0;0;0;0;0;0;0;0;0;0;0;0;0;0;0;0;0;0;0;0;0;0;0;0;0;0;0;0;0;0;0;0;0;0;0;0;0;0;0;0;0;0;0;0;0;0;0;0;0;0;0;0;0;0;0;0;0;0;0;0;0;0;0;0;0;0;0;0;0;0;0;0;0;0;0;0…
crun;Critoniopsis uniflora;(Sch. Bip.) H. Rob.;0;0;0;0;0;0;0;0;0;0;0;0;0;0;0;0;0;0;0;0.01;0;0;0;0;0;0;0;0;0;0;0;0;0;0;0;0;0;0;0;0;0;0;0;0;0;0;0;0;0;0;0;0;0;0;0;0;0;0;0;0;0;0;0;0;0;0;0;0;0;0;0;0;0;0;0;0;0;0;0;0;0;0;0;0;0;0;0;0;0;0;0;0;0;0;0;0;0;0;0;0;0;0;0;0;0;0;0;0;0;0;0;0;0;0;0;0;0;0;0;0;0;0;0;0;0;0;0;0;0;0;0;0;0;0;0;0;0;0;0;0;0;0;0;0;0;0;0;0;0;0;0;0;0;0;0;0;0;0;0;0;0;0;0;0;0;0;0;0;0;0;0;0;0;0;0…
cugl;Cuphea glutinosa;Cham. & Schltdl.;0;0;0;0;0;0;0;0;0;0.15;0;0;0;0;0;0;0;0;0;0;0;0;0;0;0;0;0;0;0;0;0;0.025;0;0;0;0.01;0;0;0;0;0;0;0;0;0;0;0;0;0;0;0;0;0;0;0;0;0;0;0;0.025;0;0;0;0;0;0;0;0;0;0;0;0;0;0;0;0;0;0;0;0;0;0;0;0;0;0;0;0;0;0;0;0;0;0;0;0;0;0;0.025;0;0;0;0;0;0;0;0;0;0;0;0;0;0;0;0;0;0;0;0;0;0.01;0;0;0;0;0;0;0;0;0;0;0;0;0;0;0;0;0;0;0;0.025;0;0;0;0;0;0;0.025;0;0;0.025;0;0;0;0;0;0;0;0;0;0;0;0;0…
cusp;Cuphea sp.;;0;0;0;0;0;0;0;0;0;0;0;0;0;0;0;0;0;0;0;0;0;0;0;0;0;0;0;0;0;0;0;0;0;0;0;0;0;0;0;0;0;0;0;0;0;0;0;0;0;0;0;0;0;0;0;0;0;0;0;0;0;0;0;0;0;0;0;0;0;0;0;0;0;0;0;0;0;0;0;0;0;0;0;0;0;0;0;0;0;0;0;0;0;0;0;0;0;0;0;0;0;0;0;0;0;0;0;0;0;0;0;0;0;0;0;0;0;0;0;0;0;0;0;0;0;0;0;0;0;0;0;0;0;0;0;0;0;0;0;0;0;0;0;0;0;0;0;0;0;0;0;0;0;0;0;0;0;0;0;0;0;0;0;0;0;0;0;0;0;0;0;0;0;0;0;0;0;0;0;0;0;0;0;0;0;0;0;0;0;0;0;…
cutu;Cuphea tuberosa;Cham. & Schltdl.;0;0;0;0;0;0;0;0;0;0;0;0;0;0;0;0;0;0;0;0;0;0;0;0;0;0;0;0;0;0;0;0;0;0;0;0;0;0;0;0;0;0;0;0;0;0;0;0;0;0;0;0;0;0;0;0;0;0;0;0;0;0;0;0;0;0;0;0;0;0;0;0;0;0;0;0;0;0;0;0;0;0;0;0;0;0;0;0;0;0;0;0;0;0;0;0;0;0;0;0;0;0;0;0;0;0;0;0;0;0;0;0;0;0;0;0;0;0;0;0;0;0;0;0;0;0;0;0;0;0;0;0;0;0;0;0;0;0;0;0;0;0;0;0;0;0;0;0;0;0;0;0;0;0;0;0;0;0;0;0;0;0;0;0;0;0;0;0;0;0;0;0;0;0;0;0;0;0;0;0;0…
cyle;Cyclospermum leptophyllum;(Pers.) Sprague ex Britton & P. Wilson;0;0;0;0;0;0;0;0;0;0;0;0;0;0;0;0;0;0;0;0;0;0;0;0;0;0;0;0;0;0;0;0;0;0;0.15;0;0;0;0;0;0;0;0;0;0;0;0;0;0;0;0;0;0;0;0;0;0;0;0;0;0;0;0;0;0;0;0;0.01;0.01;0.01;0;0;0;0;0;0;0;0;0;0.01;0;0;0.01;0.01;0;0;0;0;0;0;0;0;0;0;0.025;0;0.01;0;0;0.01;0.025;0;0;0;0;0;0;0;0;0;0;0;0;0;0;0;0;0;0;0;0;0.025;0;0;0;0;0;0;0;0;0;0;0;0.01;0;0;0;0;0;0;0;0;0;0…
cyda;Cynodon dactylon;(L.) Pers.;0;0;0;0;0;0;0;0;0;0;0;0;0;0;0;0;0;0;0;0;0;0;0;0;0;0;0;0;0;0;0;0;0;0;0;0;0;0;0;0;0;0;0;0;0;0;0;0;0;0;0;0;0;0;0;0;0;0;0;0;0;0;0;0;0;0;0;0;0;0;0;0;0;0;0;0;0;0;0;0;0;0;0;0;0;0;0;0;0;0;0;0;0;0;0;0;0;0;0;0;0;0;0;0;0;0;0;0;0;0;0;0;0;0;0;0;0;0;0;0;0;0;0;0;0;0;0;0;0;0;0;0;0;0;0;0;0;0;0;0;0;0;0;0;0;0;0;0;0;0;0;0;0;0;0;0;0;0;0;0;0;0;0;0;0;0;0;0;0;0;0;0;0;0;0;0;0;0;0;0;0;0;0;…
cysp;Cyperus sp;;0;0;0;0;0;0;0;0;0;0;0;0;0;0;0;0;0;0;0;0;0;0;0;0;0;0;0;0;0;0;0;0;0;0;0;0;0;0;0;0;0;0;0;0;0;0;0;0;0;0;0;0;0;0;0;0;0;0;0;0;0;0;0;0;0;0;0;0;0;0;0;0;0;0;0;0;0;0;0;0;0;0;0;0;0;0;0;0;0;0;0;0;0;0;0;0;0;0;0;0;0;0;0;0;0;0;0;0;0;0;0;0;0;0;0;0;0;0;0;0;0;0;0;0;0;0;0;0;0;0;0;0;0;0;0;0;0;0;0;0;0;0;0;0;0;0;0;0;0;0;0;0;0;0.01;0;0;0;0;0;0;0;0;0;0;0;0;0;0;0;0;0;0;0;0;0;0;0;0;0;0;0;0;0;0;0;0;0;0;0;0…
disa;Panicum sabulorum;Lam.;0;0;0;0;0;0;0;0;0;0;0;0;0.15;0;0;0;0;0;0;0;0;0;0;0;0.025;0.62;0;0;0;0;0;0;0;0;0;0;0;0;0;0;0;0;0;0;0;0;0;0;0.37;0;0;0;0;0;0;0;0;0;0;0;0;0;0;0;0;0;0;0.15;0;0;0;0.15;0;0.01;0;0.01;0;0;0;0;0;0;0;0;0;0;0;0;0;0;0;0;0;0;0;0;0;0;0;0;0;0;0;0;0;0;0;0;0;0;0;0;0;0;0;0;0;0;0;0;0;0;0;0;0;0;0;0;0;0.025;0;0;0;0;0;0;0;0;0;0;0;0;0;0;0;0;0;0;0.01;0;0;0;0;0;0;0;0;0;0;0;0;0;0;0;0;0.025;0;0…
dima;Dichondra macrocalyx;Meisn.;0;0;0;0;0;0;0;0;0;0;0;0;0;0;0;0;0;0;0;0;0;0;0;0;0;0;0;0;0;0;0;0;0;0;0;0;0;0;0;0;0;0;0;0;0;0;0;0;0;0;0;0;0;0;0;0;0;0;0;0;0;0;0;0;0;0;0;0;0;0;0;0;0;0;0;0;0;0;0;0;0;0;0;0;0;0;0;0;0;0;0;0;0;0;0;0;0;0;0;0;0;0;0;0;0;0;0;0;0;0;0;0;0;0;0;0;0;0;0;0;0;0;0;0;0;0;0;0;0;0;0;0;0;0;0;0;0;0;0;0;0;0;0;0;0;0;0;0;0;0;0;0;0;0;0;0;0;0;0;0;0;0;0;0;0;0;0;0;0;0;0;0;0;0;0;0;0;0;0;0;0;0;0;…
dise;Dichondra sericea;Sw.;0.01;0.025;0;0.025;0;0;0;0;0.01;0;0.01;0.01;0;0.025;0.15;0.025;0;0.025;0.025;0.025;0.025;0;0.025;0.025;0;0.025;0.025;0.025;0.025;0;0;0;0.01;0;0.025;0.01;0;0.01;0;0;0.025;0;0;0;0;0;0.025;0;0.01;0.01;0.01;0;0.025;0.025;0;0;0;0;0;0;0;0;0.025;0;0;0;0;0.025;0;0.01;0.01;0.01;0;0;0.01;0;0.025;0.025;0;0.01;0.025;0;0;0;0;0;0;0;0.025;0;0;0;0;0;0;0;0.01;0;0;0;0;0;0;0;0;0;0;0;0;0;0…
disp;Dichondra sp;;0;0;0;0;0;0;0;0;0;0;0;0;0;0;0;0;0;0;0;0;0;0;0;0;0;0;0;0;0;0;0;0;0;0;0;0;0;0;0;0;0;0;0;0;0;0;0;0;0;0;0;0;0;0;0;0;0;0;0;0;0;0;0;0;0;0;0;0;0;0;0;0;0;0;0;0;0;0;0;0;0;0;0;0;0;0;0;0;0;0;0;0;0;0;0;0;0;0;0;0;0;0;0;0;0;0;0;0;0;0;0;0;0;0;0;0;0;0;0;0;0;0;0;0;0;0;0;0;0;0;0;0;0;0;0;0;0;0;0;0;0;0;0;0;0;0;0;0;0;0;0;0;0;0;0;0;0;0;0;0;0;0;0;0;0;0;0;0;0;0;0;0;0;0;0;0;0;0;0;0;0;0;0;0;0;0;0;0;0;0;…
elin;Eleusine indica;(L.) Gaertn.;0;0;0;0;0;0;0;0;0;0;0;0;0;0;0;0;0;0;0;0;0;0;0;0;0;0;0;0;0;0;0;0;0;0;0;0;0;0;0;0;0;0;0;0;0;0;0;0;0;0;0;0;0;0;0;0;0;0;0;0;0;0;0;0;0;0;0;0;0;0;0;0;0;0;0;0;0;0;0;0;0;0;0;0;0;0;0;0;0;0;0;0;0;0;0;0;0;0;0;0;0;0;0;0;0;0;0;0;0;0;0;0;0;0;0;0;0;0;0;0.01;0;0;0;0;0;0;0;0;0;0;0;0;0;0;0;0;0;0;0;0;0;0;0;0;0;0;0;0;0;0;0;0;0;0;0;0;0;0;0;0;0;0;0;0;0;0;0;0;0;0;0;0;0;0;0;0;0;0;0;0;0;…
eltr;Eleusine tristachya;(Lam.) Lam.;0;0;0;0;0;0;0;0;0;0;0;0;0;0;0;0;0;0;0;0;0;0;0;0;0;0;0;0;0;0;0;0;0;0;0;0;0;0;0;0;0;0;0;0;0;0;0;0;0;0;0;0;0;0;0;0;0;0;0;0;0;0;0;0;0;0;0;0;0;0;0;0;0;0;0;0;0;0;0;0;0;0;0;0;0;0;0;0;0;0;0;0;0;0;0;0;0;0;0;0;0;0;0;0;0;0.025;0;0;0;0;0;0;0;0;0;0.025;0;0;0;0;0;0;0;0;0;0;0;0;0;0;0;0;0;0;0;0;0;0;0;0;0;0;0;0;0;0;0;0;0;0;0;0;0;0;0;0;0;0;0;0;0;0;0;0.025;0;0;0;0;0;0;0;0;0;0;0;…
erac;Eragrostis acutiglumis;Parodi;0;0;0;0;0;0;0;0;0;0;0;0;0;0;0;0;0;0;0;0;0;0;0;0;0;0;0;0;0;0;0;0;0;0;0;0;0;0;0;0;0;0;0;0;0;0;0;0;0;0;0;0;0;0;0;0;0;0;0;0;0;0;0;0;0;0;0;0;0;0;0;0;0;0;0;0;0;0;0;0;0;0;0;0;0;0;0;0;0;0;0;0;0;0;0;0;0;0;0;0;0;0;0;0;0;0;0;0;0;0;0;0;0;0;0;0;0;0;0;0;0;0;0;0;0;0;0;0;0;0;0;0;0;0;0;0;0;0;0;0;0;0;0;0;0;0;0;0;0;0;0;0;0;0;0;0;0;0;0;0;0;0;0;0;0;0;0;0;0;0;0;0;0;0;0;0;0;0;0;0;0;0;…
erai;Eragrostis airoides;Nees;0;0;0;0;0;0;0;0;0;0;0;0;0;0;0;0;0;0;0;0;0.15;0;0;0;0;0;0;0;0;0;0;0;0;0;0.025;0;0;0;0;0;0;0;0;0;0;0;0;0;0;0;0;0;0;0;0;0;0;0;0;0;0.025;0;0;0;0;0.025;0;0;0;0;0;0;0;0;0;0;0;0;0;0;0;0;0;0;0;0;0;0;0;0;0;0;0;0;0;0;0;0;0.01;0;0;0;0;0;0;0;0;0;0;0;0;0;0;0;0;0;0;0;0;0;0;0;0;0;0;0;0;0;0;0;0;0;0;0;0;0;0;0;0;0;0;0;0;0;0;0;0;0;0;0;0;0;0;0;0;0;0;0;0;0;0;0;0;0;0;0;0;0;0;0;0;0;0;0;0;0…
erba;Eragrostis bahiensis;Schrad. ex Schult.;0;0;0;0;0;0;0;0;0;0;0;0;0;0;0;0;0;0;0;0;0;0;0;0;0;0;0;0;0;0;0;0;0;0;0;0;0;0;0;0;0;0;0;0;0;0;0;0;0;0;0;0;0;0;0;0;0.025;0;0;0;0;0;0;0;0;0;0;0;0;0;0;0;0;0;0;0;0;0;0;0;0;0;0;0;0;0;0;0;0;0;0;0;0;0;0;0;0;0;0;0;0;0;0;0;0;0;0;0;0;0;0;0;0;0;0;0;0;0;0;0;0;0;0;0;0;0;0;0;0;0;0;0;0;0;0;0;0;0.025;0;0;0;0;0;0;0;0;0;0;0;0;0;0;0;0;0;0;0;0;0;0;0;0;0;0;0;0;0;0;0;0;0;0;0;…
erlu;Eragrostis lugens;Nees;0;0;0;0;0;0;0;0;0.15;0;0;0;0;0;0;0;0;0;0;0;0;0;0;0;0;0;0;0;0;0;0;0;0;0;0;0;0;0;0;0;0;0;0;0;0;0;0;0;0;0;0;0;0;0;0;0;0;0.01;0;0;0;0;0;0;0;0;0;0;0;0;0;0;0;0;0;0;0;0;0;0;0;0;0;0;0;0;0;0;0;0;0;0;0;0;0;0;0;0;0;0;0;0;0.025;0;0;0;0;0;0;0;0;0.025;0;0;0;0;0;0;0;0;0;0;0;0;0;0;0;0;0;0;0;0;0;0;0;0;0;0;0;0;0;0;0;0;0;0;0;0;0;0;0;0;0.01;0;0;0;0.025;0;0;0;0;0;0;0;0;0;0;0;0;0;0;0;0;0;0;…
erne;Eragrostis neesii;Trin.;0;0;0;0;0;0;0;0;0;0;0;0;0;0;0;0;0;0;0;0;0;0;0;0;0.025;0;0;0;0;0;0;0;0;0;0;0.01;0;0;0;0;0;0;0;0;0;0;0;0;0;0;0;0;0;0;0;0;0;0;0;0;0;0;0;0;0;0;0;0;0;0;0;0;0;0;0;0;0;0;0;0;0.15;0;0;0;0;0;0;0;0;0;0;0;0;0;0;0;0;0;0;0;0;0;0.025;0;0;0;0;0;0;0;0;0;0;0;0;0;0.025;0;0;0;0;0;0;0;0;0;0;0;0;0;0;0;0;0;0;0;0;0;0;0;0;0;0;0;0;0;0;0;0;0;0;0;0;0;0;0;0;0;0;0;0;0;0;0;0;0;0;0;0;0;0;0;0;0;0;0;…
erpl;Eragrostis plana;Nees;0;0;0;0;0;0;0;0;0;0;0;0;0;0;0;0;0;0;0;0;0;0;0;0;0;0;0;0;0;0;0;0;0;0;0;0;0;0;0;0;0;0;0;0;0;0;0;0;0;0;0;0;0;0;0;0;0;0;0.01;0;0;0;0;0;0;0;0;0;0;0;0;0;0;0;0;0;0;0;0;0;0;0.01;0;0;0.025;0.025;0.37;0.62;0.01;0.025;0;0;0;0;0;0;0;0;0.025;0;0;0;0;0;0;0;0;0;0;0;0;0;0;0;0;0;0;0.62;0.62;0.37;0.15;0.15;0.15;0.37;0.025;0.15;0;0;0;0;0;0;0;0;0;0.62;0.37;0.87;0.37;0.87;0.37;0;0;0;0;0;0;0…
erci;Eryngium ciliatum;Cham. & Schltdl.;0;0;0;0;0;0;0;0;0;0;0;0;0;0;0;0;0;0;0;0;0;0;0;0;0;0;0;0;0;0;0;0;0;0;0;0;0;0;0;0;0;0;0;0;0;0;0;0;0;0;0;0;0;0;0;0;0;0;0;0;0;0;0;0;0;0;0;0;0;0;0;0;0;0;0;0;0;0;0;0;0;0;0;0;0;0;0;0;0;0;0;0;0;0;0;0;0;0;0;0;0;0;0;0;0;0;0;0;0;0;0;0;0;0;0;0;0;0;0;0;0;0;0;0;0;0;0;0;0;0;0;0;0;0;0;0;0;0;0;0;0;0;0;0;0;0;0;0;0;0;0;0;0;0;0;0;0;0;0;0;0;0;0;0;0;0;0;0;0;0;0;0;0;0;0;0;0;0;0;0…
erec;Eryngium echinatum;Urb.;0.01;0;0;0;0;0;0.01;0;0;0;0.01;0;0;0.01;0;0;0;0;0;0;0;0;0;0;0;0;0;0;0.01;0.025;0;0;0;0;0;0;0;0;0.01;0.025;0;0;0;0;0;0;0;0;0;0;0.025;0;0.01;0;0;0;0;0;0;0;0;0;0;0;0;0;0;0;0;0;0;0;0;0;0;0;0;0;0;0;0;0;0;0;0;0;0;0;0;0;0;0;0;0;0;0;0;0;0;0;0;0;0;0;0;0;0;0;0;0;0;0;0;0;0;0;0;0;0;0;0;0;0;0;0;0;0;0;0;0;0;0;0;0;0;0;0;0;0;0;0;0;0;0;0;0;0;0;0;0;0;0;0;0;0;0;0;0;0;0;0;0;0;0;0;0;0;0;0…
erel;Eryngium elegans;Cham. & Schltdl.;0;0;0;0;0;0;0;0;0;0;0;0;0;0;0;0;0;0;0;0;0;0;0;0;0;0;0;0;0;0;0;0;0;0;0;0;0;0;0;0;0;0;0;0;0;0;0;0;0;0;0;0;0;0;0;0;0;0;0;0;0;0;0;0;0;0;0;0;0;0;0;0;0;0;0;0;0;0;0;0;0;0;0;0;0;0;0;0;0;0;0;0;0;0;0;0;0;0;0;0;0;0;0;0;0.01;0;0;0;0;0;0;0;0;0;0;0;0;0;0;0;0;0;0;0;0;0;0;0;0;0;0;0;0;0;0;0;0;0;0;0;0;0;0;0;0;0;0;0;0;0;0;0;0;0;0;0;0;0;0;0;0;0;0;0;0;0;0;0;0;0;0;0;0;0;0;0;0;0;0…
erho;Eryngium horridum;Malme;0;0;0;0;0;0;0;0;0;0;0;0;0;0;0;0;0;0;0;0;0;0;0;0;0;0;0;0;0;0;0;0;0;0;0;0;0;0;0;0;0;0;0;0;0;0;0;0;0;0;0;0;0;0;0;0;0;0;0;0;0;0;0;0;0;0;0;0;0;0;0;0;0;0;0;0;0;0;0;0;0;0;0;0;0;0;0;0;0;0;0;0;0;0;0;0;0;0;0;0;0;0;0;0;0;0;0;0;0;0;0;0;0;0;0;0;0;0;0;0;0;0;0;0;0;0;0;0;0;0;0;0;0;0;0;0;0;0;0;0;0;0;0;0;0;0;0;0;0;0;0;0;0;0;0;0;0;0;0;0;0;0;0;0;0;0;0;0;0;0;0;0;0;0;0;0;0;0;0;0;0;0;0;0;0;…
ernu;Eryngium nudicaule;Lam.;0;0;0;0;0;0;0;0;0;0;0;0;0;0;0;0.15;0;0;0;0;0;0.15;0;0;0;0;0;0;0;0;0;0;0.15;0.37;0.15;0.15;0;0;0;0;0;0;0;0;0;0;0;0;0;0;0;0;0;0;0;0;0;0;0;0;0;0;0;0;0;0;0;0;0;0;0;0;0;0;0;0;0;0;0;0;0;0;0;0;0;0;0;0;0;0;0;0;0.025;0;0;0;0.025;0;0;0;0;0;0.15;0;0.01;0;0;0;0;0;0;0;0;0;0.37;0.15;0.025;0.025;0;0.01;0;0;0.025;0;0;0;0;0;0;0;0.025;0.025;0.025;0;0.01;0;0;0;0;0.025;0;0;0;0;0;0;0;0;0;…
acbu;Acanthostyles buniifolius;(Hook. ex Arn.) R.M. King & H. Rob.;0;0;0;0;0;0;0;0;0;0;0;0;0;0;0;0;0;0;0;0;0;0;0;0;0;0;0;0;0;0;0.025;0;0;0;0;0;0;0;0;0;0;0;0;0;0;0;0;0;0;0;0;0;0;0;0;0;0;0;0;0;0;0;0;0;0;0;0;0;0;0;0;0;0;0;0;0;0;0;0;0;0;0;0;0;0;0;0;0;0;0;0;0;0;0;0;0;0;0;0;0;0;0;0;0;0;0;0;0;0;0;0;0;0;0;0;0;0;0;0;0;0;0;0;0;0;0;0;0;0;0;0;0;0;0;0;0;0;0;0;0;0;0;0;0;0;0;0;0;0;0;0;0;0;0;0;0;0;0;0;0;0;0;0;0;…
evse;Evolvulus sericeus;Sw.;0;0;0;0;0;0;0;0;0;0;0;0;0;0;0;0;0;0;0;0;0;0;0;0;0;0;0;0;0;0;0;0;0;0;0;0;0;0;0;0;0;0;0;0;0;0;0;0;0;0;0;0;0;0;0;0;0;0;0;0;0;0;0;0;0;0;0;0;0;0;0;0;0;0;0;0;0;0;0;0;0;0;0;0;0;0;0;0;0;0;0;0;0;0;0;0;0;0;0;0;0;0;0;0;0;0;0;0;0;0;0;0;0;0;0;0;0;0;0;0;0;0;0;0;0;0;0;0;0;0;0;0;0;0;0;0;0;0;0;0;0;0;0;0;0;0;0;0;0;0;0;0;0;0;0;0;0;0;0;0;0;0;0;0;0;0;0;0;0;0;0;0;0;0;0;0;0;0;0;0;0;0;0;0;0;0…
gari;Galium richardianum;(Gillies ex Hook. & Arn.) Endl. ex Walp.;0;0;0;0;0;0;0;0;0;0;0;0;0;0;0;0;0;0;0;0;0;0;0;0;0;0;0;0;0;0;0;0;0;0;0;0;0;0;0;0;0;0;0;0;0;0;0;0;0;0;0;0;0;0;0;0;0;0;0;0;0;0;0;0;0;0;0;0;0;0;0;0;0;0;0;0;0;0;0;0;0;0;0;0.01;0;0;0;0;0;0;0;0;0;0;0;0.025;0.01;0;0.01;0;0.01;0.01;0;0;0;0;0;0;0.025;0;0;0;0;0.025;0.025;0;0;0;0;0;0;0;0;0;0;0;0;0;0;0;0;0;0;0;0;0;0;0;0;0;0;0;0;0;0;0;0;0;0;0;0;…
gaco;Gamochaeta coarctata;(Willd.) Kergu_len;0;0;0;0;0;0;0;0;0;0;0;0;0.025;0;0;0;0;0;0;0;0;0;0;0;0.025;0;0;0;0;0;0;0;0;0;0;0;0;0;0;0;0;0;0;0;0;0;0;0.01;0;0;0;0;0;0;0;0;0;0;0;0;0;0;0;0;0;0.025;0;0;0;0;0.01;0.01;0.01;0;0;0;0;0;0;0;0;0;0;0;0;0;0;0.025;0;0;0;0;0;0;0;0;0;0;0;0;0;0;0;0;0;0;0.025;0;0;0;0;0;0;0;0;0;0;0.025;0;0;0;0;0;0.025;0;0;0;0;0;0;0;0;0;0;0;0.025;0;0;0.025;0;0;0;0;0;0;0;0;0;0;0.025;0;…
glse;Glandularia selloi;(Spreng.) Tronc.;0;0.01;0;0;0;0;0;0.01;0;0;0;0;0.025;0;0;0.025;0;0.025;0;0.01;0;0;0;0;0.025;0;0.025;0;0;0;0;0.15;0;0;0;0.15;0;0;0;0;0;0;0;0;0;0;0;0.025;0.15;0;0;0;0;0;0;0.025;0;0;0;0;0;0;0;0;0;0;0;0.025;0;0;0.025;0;0;0;0.15;0.025;0;0;0.025;0;0;0;0.025;0.01;0;0.025;0;0;0;0;0;0;0;0;0;0;0;0;0;0;0.01;0;0;0;0;0;0;0;0;0;0;0;0;0;0.025;0;0;0.025;0.025;0;0.025;0;0.025;0;0;0.025;0;0…
goce;Gomphrena celosioides;Mart.;0;0;0;0;0;0;0;0;0;0;0;0;0;0;0;0;0;0;0;0;0;0;0;0;0;0;0;0;0;0;0;0;0;0;0;0;0;0;0;0;0;0;0;0;0;0;0;0;0;0;0;0;0;0;0;0;0;0;0;0;0;0;0;0;0;0;0;0;0;0;0;0;0;0;0;0;0;0;0;0;0;0;0;0;0;0;0;0;0;0;0;0;0;0;0;0;0;0;0;0.01;0;0;0;0;0;0;0;0;0;0;0;0;0;0;0;0;0;0;0;0;0;0;0;0;0;0;0;0;0;0;0;0;0;0;0;0;0;0;0;0;0;0;0;0;0;0;0;0;0;0;0;0;0;0;0;0;0;0;0;0;0;0;0;0;0;0;0.025;0;0;0;0;0;0;0;0;0;0;0;0;0…
grpe;Gratiola peruviana;L.;0;0;0;0;0;0;0;0;0;0;0;0;0;0;0;0;0;0;0;0;0;0;0;0;0;0;0;0;0;0;0;0;0;0;0;0;0;0;0;0;0;0;0;0;0;0;0;0;0;0;0;0;0;0;0;0;0;0;0;0;0;0;0;0;0;0;0;0;0;0;0;0;0;0;0;0;0;0;0;0;0;0;0;0;0;0;0;0;0;0;0;0;0;0;0;0;0;0;0;0;0;0;0;0;0;0;0;0;0;0;0;0;0;0;0;0;0;0;0;0;0;0;0;0;0;0;0;0;0;0;0;0;0;0;0;0;0;0;0;0;0;0;0;0;0;0;0;0;0;0;0;0;0;0;0;0;0;0;0;0;0;0;0;0;0;0;0;0;0;0;0;0;0;0;0;0;0;0;0;0;0;0;0;0;0;0;…
hepu;Herbertia pulchella;Sweet;0;0;0;0;0;0;0;0;0;0;0;0;0;0;0;0;0;0;0;0;0;0;0;0;0;0;0;0;0;0;0;0;0.01;0;0;0.01;0;0;0;0;0;0;0;0;0;0;0;0;0.01;0;0;0;0;0;0;0;0;0;0;0;0;0;0;0;0;0.025;0;0.025;0;0;0.01;0;0;0;0;0;0;0;0;0.01;0;0;0.025;0.01;0;0;0;0;0;0;0;0;0.025;0;0;0;0;0.025;0.01;0;0;0;0;0;0;0.025;0;0;0.025;0;0;0;0;0;0;0.025;0;0;0;0;0;0;0;0;0;0.025;0;0;0;0;0;0;0.01;0;0.025;0.025;0;0;0;0;0;0;0;0;0;0;0;0;0;0;…
hyas;Centella asiatica;(L.) Urb.;0;0;0;0;0;0;0;0;0;0;0;0;0;0;0;0;0;0;0;0;0;0;0;0;0;0;0;0;0;0;0;0;0;0;0;0;0;0;0;0;0;0;0;0;0;0;0;0;0;0;0;0;0;0;0;0;0;0;0;0;0;0;0;0;0;0;0;0;0;0;0;0;0;0;0;0;0;0;0;0;0;0;0;0;0;0;0;0;0;0;0;0;0;0;0;0;0.01;0;0;0;0;0;0;0;0;0;0;0;0;0;0;0;0;0;0;0;0;0;0;0;0;0;0;0;0;0;0;0;0;0;0;0;0;0;0;0;0;0;0;0;0;0;0;0;0;0;0;0;0;0;0;0;0;0;0;0;0;0;0;0;0;0;0;0;0;0;0;0;0;0;0;0;0;0;0;0;0;0;0;0;0;0…
hymi;Hypochaeris microcephala;(Sch. Bip.) Cabrera;0;0;0;0;0;0;0;0;0;0;0;0;0;0;0;0;0;0;0;0;0;0;0;0;0;0;0;0;0;0;0;0;0;0;0;0;0;0;0;0;0;0;0;0;0;0;0;0;0;0;0;0;0;0;0;0;0;0;0;0;0;0;0;0;0;0;0;0;0;0;0;0;0;0;0;0;0;0;0;0;0;0;0;0;0;0;0;0;0;0;0;0;0;0;0;0;0;0;0;0;0;0;0;0;0;0;0;0;0;0;0;0;0;0;0;0;0;0;0;0;0;0;0;0;0;0;0;0;0;0;0;0;0;0;0;0;0;0;0;0;0;0;0;0;0;0;0;0;0;0;0;0;0;0;0;0;0;0;0;0;0;0;0;0;0;0;0;0;0;0;0;0;0;0;0…
hyde;Hypoxis decumbens;L.;0;0;0.01;0.025;0;0;0;0.01;0.15;0;0.15;0;0.15;0;0;0.15;0;0;0;0;0;0;0;0;0;0;0.025;0;0;0;0;0;0;0;0;0;0;0;0;0;0;0;0;0;0;0;0;0;0;0;0;0;0.01;0;0;0;0;0.025;0;0;0;0;0.025;0;0;0;0;0;0;0;0;0;0;0;0;0;0;0.01;0;0;0;0;0;0;0;0;0;0;0;0;0;0;0;0;0;0;0;0;0;0;0;0;0;0;0;0;0.025;0;0;0;0;0;0;0.025;0;0;0;0;0;0;0;0;0;0;0;0;0;0;0;0;0;0;0;0.025;0;0;0;0;0;0;0;0;0;0;0;0;0;0;0;0;0.01;0;0;0;0;0;0;0;0;…
jubu;Juncus bufonius;L.;0;0;0.025;0.01;0;0;0;0;0.025;0;0;0.37;0;0.025;0;0;0.15;0;0;0;0;0;0;0;0;0;0;0;0;0;0.025;0;0;0;0;0;0;0.01;0;0;0.025;0.025;0;0;0;0;0;0;0;0;0;0;0;0;0;0.025;0;0;0.01;0;0;0;0;0;0;0;0;0;0;0.025;0;0;0;0;0;0;0;0;0;0;0.01;0;0;0;0;0;0;0;0;0;0.01;0;0;0;0;0;0;0;0;0;0.01;0;0;0;0;0.025;0;0;0;0;0;0;0;0;0;0;0.025;0;0;0;0;0;0;0;0;0;0;0;0;0.025;0;0;0;0;0.025;0;0;0;0;0;0;0;0;0;0;0;0;0;0.025;0…
juca;Juncus capillaceus;Lam.;0;0;0;0;0;0;0;0;0.025;0;0;0;0;0;0.025;0;0;0;0;0;0;0;0;0;0;0;0;0;0;0;0;0;0;0;0;0;0;0;0;0;0;0.025;0;0;0;0;0;0;0;0;0;0;0;0;0;0;0;0.025;0;0;0;0;0;0;0;0;0;0;0;0;0;0;0;0;0.01;0;0;0;0;0;0;0;0;0;0;0;0;0;0;0;0;0;0;0;0;0;0;0;0;0;0;0;0;0;0;0;0;0;0;0;0;0;0;0;0;0;0;0;0;0;0;0;0;0;0;0;0;0;0;0;0;0;0;0;0;0;0;0;0;0;0;0;0;0;0;0;0;0;0;0;0;0;0;0;0;0;0;0;0;0;0;0;0;0;0;0;0;0;0;0;0;0;0;0;0;0…
kicl;Kikuyuochloa clandestina;(Hochst. ex Chiov.) H. Scholz;0;0;0;0;0;0;0;0;0;0;0;0;0;0;0;0;0;0;0;0;0;0;0;0;0;0;0;0;0;0;0;0;0;0;0;0;0;0;0;0;0;0;0;0;0;0;0;0;0;0;0;0;0;0;0;0;0;0;0;0;0;0;0;0;0;0;0;0;0;0;0;0;0;0;0;0;0;0;0;0;0;0;0;0;0;0;0;0;0;0;0;0;0;0;0;0;0;0;0;0;0;0;0;0;0;0;0;0;0;0;0;0;0;0;0;0;0;0;0;0;0;0;0;0;0;0;0;0;0;0;0;0;0;0;0;0;0;0;0;0;0;0;0;0;0;0;0;0;0;0;0;0;0;0;0;0;0;0;0;0;0;0;0;0;0;0;0;0;0;0…
kybr;Kyllinga brevifolia;Rottb.;0.15;0;0;0;0;0.01;0;0;0;0;0.15;0;0.15;0.025;0.01;0.15;0;0;0.025;0;0;0;0;0;0.62;0;0;0;0;0;0;0;0.01;0;0;0;0;0;0;0;0;0;0;0;0;0;0;0;0;0.025;0;0;0;0;0;0.15;0;0;0;0;0;0;0;0;0.01;0;0;0;0.01;0;0;0;0;0;0;0;0;0.01;0;0;0.15;0;0;0;0;0;0;0.025;0;0;0;0;0;0;0;0.025;0.01;0;0;0;0;0;0;0;0;0.01;0;0;0;0;0;0;0;0;0;0;0;0;0;0.025;0;0;0;0;0;0;0;0.025;0;0.025;0;0;0;0;0;0;0;0;0;0;0;0;0;0;0.…
kyod;Kyllinga odorata;Vahl;0;0;0;0;0;0;0;0;0;0;0;0;0;0;0;0;0;0;0;0;0;0;0;0;0;0;0;0;0;0;0;0;0;0;0;0;0;0;0;0;0;0;0;0;0;0;0;0;0;0;0;0;0;0;0;0;0;0;0;0;0;0;0;0;0;0;0;0;0;0;0;0;0;0;0;0;0;0;0;0;0;0;0;0;0;0;0;0;0;0;0;0;0;0;0;0;0;0;0;0;0;0;0.025;0;0;0;0;0;0;0;0;0;0;0;0;0;0;0;0;0;0;0;0;0;0;0;0;0;0;0;0;0;0;0;0;0;0;0;0;0;0;0;0;0;0;0;0;0;0;0;0;0;0;0;0;0;0;0;0;0;0;0;0;0;0;0;0;0;0;0;0;0;0;0;0;0;0;0;0;0;0;0;0;0;…
lino;Phyla nodiflora;(L.) Greene;0;0;0;0;0;0;0;0;0;0;0;0;0;0;0;0;0;0;0;0;0;0;0;0;0;0;0;0;0;0;0;0;0;0;0;0;0;0;0;0;0;0;0;0;0;0;0;0;0;0;0;0;0;0;0;0;0;0;0;0;0;0;0;0;0;0;0;0;0;0;0;0;0;0;0;0;0;0;0;0;0;0;0;0;0;0;0;0;0;0;0;0;0;0;0;0;0;0;0;0;0;0;0;0;0;0;0;0;0;0;0;0;0;0;0;0;0;0;0;0;0;0;0;0;0;0;0;0;0;0;0;0;0;0;0;0;0;0;0;0;0;0;0;0;0;0;0;0;0;0;0;0;0;0;0;0;0;0;0;0;0;0;0;0;0;0;0;0;0;0;0;0;0;0;0;0;0;0;0;0;0;0;0;…
lomu;Lolium multiflorum;Lam.;0.37;0.37;0.15;0.15;0.15;0.15;0.15;0.15;0.37;0;0;0;0.15;0.025;0.15;0;0;0.025;0;0;0;0;0;0;0;0;0;0.025;0;0.62;0;0.025;0;0;0.025;0;0.37;0.15;0.37;0.37;0.37;0.62;0.37;0.37;0.37;0;0;0;0;0;0;0;0;0;0;0.15;0.025;0.37;0.15;0.15;0.37;0.37;0.37;0;0;0;0;0;0;0;0;0;0;0.15;0.01;0.025;0;0;0;0;0;0.025;0.37;0.62;0.15;0;0.025;0.025;0.15;0.15;0;0.025;0;0.15;0.37;0.37;0;0.37;0;0;0;0;0;0;0…
loco;Lotus corniculatus;L.;0.37;0.15;0.15;0.15;0.15;0.15;0.025;0.15;0.37;0.15;0.025;0.15;0.15;0.37;0.37;0.37;0.37;0.025;0;0;0;0;0;0;0;0.01;0;0;0.025;0.025;0.15;0;0.15;0.15;0.025;0.15;0.62;0.15;0.37;0.37;0.37;0.37;0.15;0.37;0.37;0;0;0;0;0;0;0;0;0.15;0.37;0.37;0.15;0.37;0.15;0.15;0.37;0.37;0.37;0;0;0.025;0;0;0;0;0;0;0.62;0.025;0.15;0.025;0.15;0.025;0.025;0.62;0.025;0.87;0;0.15;0.025;0.62;0;0;0;0;0;…
litt;Litter;;0;0;0;0;0;0;0;0;0;0.15;0.025;0.15;0.15;0.15;0.15;0.15;0.025;0.15;0.15;0.15;0.15;0.15;0.15;0.15;0.15;0.15;0.15;0.15;0.15;0.15;0.15;0.15;0.15;0.15;0.15;0.15;0;0;0;0;0;0;0;0;0;0.15;0.15;0.15;0.15;0.15;0.15;0.15;0.15;0.15;0;0;0;0;0;0;0;0;0;0.15;0.15;0.15;0.15;0.15;0.15;0.15;0.15;0.15;0.15;0.15;0.15;0.15;0.15;0.15;0.37;0.15;0.15;0;0;0;0.15;0.15;0;0;0;0;0.15;0.025;0.025;0.15;0.15;0.37;0;0;…
mebr;Melica brasiliana;Ard.;0;0;0;0;0;0;0;0;0;0;0;0;0;0;0;0;0;0;0;0;0;0;0;0;0;0;0;0;0;0;0;0;0;0;0;0;0;0;0;0;0;0;0;0;0;0;0;0;0;0;0;0;0;0;0;0;0;0;0;0;0;0;0;0;0;0;0;0;0;0;0;0;0;0;0;0;0;0;0;0;0;0;0;0;0;0;0;0;0;0;0;0;0;0;0;0;0;0.01;0;0;0;0;0;0;0;0;0;0;0;0;0;0;0;0;0;0;0;0;0;0;0;0;0;0;0;0;0;0;0;0;0;0;0;0;0;0;0;0;0;0;0;0;0;0;0;0;0;0;0;0;0;0;0;0;0;0;0;0;0;0;0;0;0;0;0;0;0;0;0;0;0;0;0;0;0;0;0;0;0;0;0;0;0;0;…
mesp;Melica sp.;;0;0;0;0;0;0;0;0;0;0;0;0;0;0;0;0;0;0;0;0;0;0;0;0;0;0;0;0;0;0;0;0;0;0;0;0;0;0;0;0;0;0;0;0;0;0;0;0;0;0;0;0;0;0;0;0;0;0;0;0;0;0;0;0;0;0;0;0;0;0;0;0;0;0;0;0;0;0;0;0;0;0;0;0;0;0;0;0;0;0;0;0;0;0;0;0;0;0;0;0;0;0;0;0;0;0;0;0;0;0;0;0;0;0;0;0;0;0;0;0;0;0;0;0;0;0;0;0;0;0;0;0;0;0;0;0;0;0;0;0;0;0;0;0;0;0;0;0;0;0;0;0;0;0;0;0;0;0;0;0;0;0;0;0;0;0;0;0;0;0;0;0;0;0;0;0;0;0;0.15;0;0;0;0;0;0;0;0;0;0;0…
mnse;Mnesithea selloana;(Hack.) de Koning & Sosef;0;0;0;0;0;0;0;0;0;0.37;0.15;0.15;0;0.37;0.62;0;0;0;0.37;0;0;0;0.37;0.37;0;0;0;0.15;0;0;0.15;0;0.025;0.01;0;0.37;0;0;0;0;0.37;0;0;0;0;0.15;0.025;0.15;0;0.37;0;0;0;0.025;0;0;0;0;0;0;0.01;0;0.025;0;0;0.025;0.025;0;0;0;0;0.15;0.15;0.37;0.025;0.37;0;0;0;0;0.37;0;0;0;0;0;0;0;0;0;0.025;0;0.15;0.15;0.37;0;0;0;0;0.15;0;0.025;0.025;0.025;0;0;0;0.15;0.025;0;…
oxco;Oxalis corymbosa;DC.;0;0;0;0;0.025;0;0.025;0;0.01;0;0.025;0;0;0;0.025;0;0;0;0;0;0;0;0;0;0;0;0;0;0;0;0;0;0;0;0;0;0;0;0;0;0;0;0;0;0;0;0;0;0;0;0;0;0;0;0;0;0;0;0;0;0;0;0;0.01;0;0;0;0;0;0;0;0;0;0;0.01;0;0;0;0;0;0.01;0;0;0;0;0;0;0;0;0;0;0;0;0;0;0;0.025;0;0.01;0;0.01;0;0;0;0;0;0;0;0;0;0;0;0;0;0;0;0;0;0;0;0;0;0;0;0;0;0;0;0;0;0;0;0;0;0;0;0;0;0;0;0;0;0;0;0;0;0;0;0;0;0;0;0;0;0;0;0;0;0;0;0;0;0;0;0;0;0;0…
oxse;Oxalis sellowiana;Zucc.;0;0;0;0;0;0;0;0;0;0;0;0;0;0;0;0;0;0;0;0;0;0;0;0;0;0;0;0;0;0;0;0;0;0;0;0;0;0;0;0;0;0;0;0;0;0;0;0;0;0;0;0;0;0;0;0;0;0;0;0;0;0;0;0;0;0;0;0;0;0;0;0;0;0;0;0;0;0;0;0;0;0;0;0;0;0;0;0;0;0;0;0;0;0;0;0;0;0;0;0;0;0;0;0;0;0;0;0;0;0;0;0;0;0;0;0;0;0;0;0;0;0;0;0;0;0;0;0;0;0;0;0;0;0;0;0;0;0;0;0;0;0;0;0;0;0;0;0;0;0;0;0;0;0;0;0;0;0;0;0;0;0;0;0;0;0;0;0;0;0;0;0;0;0;0;0;0;0;0;0;0;0;0;0;0;…
pabe;Panicum bergii;Arechav.;0;0;0;0;0;0;0;0;0;0;0;0;0;0;0;0;0;0;0;0;0;0;0;0;0;0;0;0;0;0;0;0;0;0;0;0;0;0;0;0;0;0;0;0;0;0;0;0;0;0;0;0;0;0;0;0;0;0;0;0;0;0;0;0;0;0;0;0;0;0;0;0;0;0;0;0;0;0;0;0;0;0;0;0;0;0;0;0;0;0;0;0;0;0;0;0;0;0;0;0;0.01;0;0;0.025;0;0;0;0;0;0;0;0;0;0.025;0;0;0;0;0;0;0.025;0;0;0;0;0;0;0;0;0;0;0;0;0;0;0;0;0;0;0;0;0.025;0;0.025;0.025;0;0;0;0;0;0;0;0;0;0;0;0;0;0;0;0;0;0.025;0;0;0;0;0;0;0…
paci;Digitaria ciliaris;(Retz.) Koeler;0;0;0;0;0;0;0;0;0;0;0;0;0;0;0;0;0;0;0;0;0;0;0;0;0;0;0;0;0;0;0;0;0;0;0;0;0;0;0;0;0;0;0;0;0;0;0;0;0;0;0;0;0;0;0;0;0;0;0;0;0;0;0;0;0;0;0;0;0;0;0;0;0;0;0;0;0;0;0;0;0;0;0;0;0;0;0;0;0;0;0;0;0;0;0;0;0;0;0;0;0;0;0;0;0;0;0;0;0;0;0;0;0;0;0;0;0;0;0;0;0;0;0;0;0;0;0;0;0;0;0;0;0;0;0;0;0;0;0;0;0;0;0;0;0;0;0;0;0;0;0;0;0;0;0;0;0;0;0;0;0;0;0;0;0;0;0;0;0;0;0;0;0;0;0;0;0;0;0;0;…
paal;Paspalum almum;Chase;0;0;0;0;0;0;0;0;0;0;0;0.15;0;0;0.37;0;0;0;0.15;0;0;0;0;0;0;0;0;0;0;0;0;0;0;0;0;0;0;0;0;0;0;0;0;0;0;0.025;0.025;0.15;0;0.62;0.62;0.15;0;0;0;0;0;0;0;0;0;0;0;0;0.15;0;0;0.37;0.025;0.15;0.025;0.15;0;0.15;0.025;0.01;0.15;0.37;0.15;0.15;0.37;0;0;0;0;0;0;0;0;0;0;0;0;0.025;0;0;0.025;0.025;0.01;0.15;0;0;0;0;0;0;0;0;0;0;0;0;0;0;0;0;0;0;0;0;0;0.025;0.025;0;0;0;0.15;0;0.15;0;0;0;0;0…
padi;Paspalum dilatatum;Poir.;0.15;0.15;0;0;0;0;0;0;0;0.37;0.15;0;0.15;0;0.37;0;0.15;0;0;0.62;0.62;0.15;0.025;0.025;0.62;0;0.37;0;0;0.15;0.37;0.15;0.37;0;0;0.37;0.025;0.025;0;0.15;0;0.62;0.15;0.025;0.025;0.37;0;0;0;0.37;0.37;0.62;0.37;0;0;0.15;0.15;0;0;0.15;0;0;0.37;0;0.01;0;0;0.15;0;0.37;0;0.15;0;0.15;0.025;0;0.025;0;0.025;0;0.37;0.025;0.15;0.15;0.62;0.15;0.37;0.37;0.15;0.15;0.37;0.15;0;0.62;0.3…
pani;Paspalum nicorae;Parodi;0;0;0;0;0;0;0;0;0;0;0;0;0;0;0;0;0;0;0;0;0;0;0;0;0;0;0;0;0;0;0;0;0;0;0;0;0;0;0;0;0;0;0;0;0;0;0;0;0;0;0.15;0.15;0;0;0;0;0;0;0;0;0;0;0;0;0;0;0;0;0;0;0;0;0;0;0;0;0;0;0;0;0;0;0;0;0;0;0;0;0;0;0;0;0;0;0;0;0;0;0;0;0;0;0;0;0;0;0;0;0;0;0;0;0;0;0;0;0;0;0;0;0;0;0;0;0;0;0;0;0;0;0;0;0;0;0;0;0;0;0;0;0;0;0;0;0;0;0;0;0;0;0;0;0;0;0;0;0;0;0;0;0;0;0;0;0;0;0;0;0;0;0;0;0;0;0;0;0;0;0;0;0;0;…
pano;Paspalum notatum;Alain ex Flªgg_;0;0;0;0.025;0.025;0;0;0;0;0.37;0.025;0;0.15;0.37;0;0;0;0.15;0;0.15;0.025;0;0;0;0;0;0;0;0;0.15;0;0;0;0;0;0;0;0;0;0;0;0;0;0;0;0;0;0;0;0;0;0.025;0.01;0;0.025;0;0;0;0;0;0;0;0;0;0;0;0;0.01;0;0;0;0;0.025;0;0;0;0.01;0;0;0;0;0;0;0;0;0;0;0;0;0;0.025;0;0.37;0;0;0;0.01;0;0.01;0;0.01;0;0;0;0;0;0;0;0;0;0;0;0;0;0;0;0;0;0;0.01;0;0;0;0;0.025;0;0;0;0;0;0.025;0;0;0;0.025;0;0;0…
papa;Paspalum pauciciliatum;(Parodi) Herter;0;0;0;0;0;0;0;0;0;0;0;0;0;0;0;0;0;0;0;0;0;0;0;0;0;0;0;0;0;0;0;0;0;0;0;0;0;0;0;0;0;0;0;0;0;0;0;0;0;0;0;0;0;0;0;0;0;0;0;0;0;0;0;0;0;0;0;0;0;0;0;0;0;0;0;0;0;0;0;0;0;0;0;0;0;0;0;0;0;0;0;0;0;0;0;0;0;0;0;0;0;0;0;0;0;0;0;0;0;0;0;0;0;0;0;0;0;0;0;0;0;0;0;0;0;0;0;0;0;0;0;0;0;0;0;0;0;0;0;0;0;0;0;0;0;0;0;0;0;0;0;0;0;0;0;0;0;0;0;0;0;0;0.025;0;0;0;0;0;0;0;0;0;0;0;0;0…
papl;Paspalum plicatulum;Michx.;0;0;0;0;0;0;0;0;0;0;0;0.37;0;0;0;0.15;0;0;0.37;0.37;0;0;0.37;0.37;0.37;0.37;0.37;0;0.37;0;0;0;0.37;0.01;0.37;0;0;0.025;0.025;0;0;0;0;0.37;0.15;0;0;0;0;0;0;0.37;0.37;0;0;0;0.15;0;0;0;0.025;0;0;0.15;0.025;0.62;0.15;0;0.15;0;0.62;0;0;0.62;0.15;0.37;0;0.37;0.15;0.025;0.37;0.025;0.025;0.025;0;0;0;0;0;0;0;0;0;0;0;0;0.15;0;0;0;0.025;0;0;0.15;0.025;0;0.025;0;0.15;0.37;0;0;…
pasp;Paspalum sp;;0;0;0;0;0;0;0;0;0;0;0;0;0;0;0;0;0;0;0;0;0;0;0;0;0;0;0;0;0;0;0;0;0;0;0;0;0;0;0;0;0;0;0;0;0;0;0;0;0;0;0;0;0;0;0;0;0;0;0;0;0;0;0;0;0;0;0;0;0;0;0;0;0;0;0;0;0;0;0;0;0;0;0;0;0;0;0;0;0;0;0;0;0;0;0;0;0;0;0;0;0;0;0;0;0;0;0;0;0;0;0;0;0;0;0;0;0;0;0;0;0;0;0;0;0;0;0;0;0;0;0;0;0;0;0;0;0;0;0;0;0;0;0;0;0;0;0;0;0;0;0;0;0;0;0;0;0;0;0;0;0;0;0;0;0;0;0;0;0;0;0;0;0;0;0;0;0;0;0;0;0;0;0;0;0;0;0;0;0;0;0…
pasp;Pavonia sp.;;0;0;0;0;0;0;0;0;0;0;0;0;0;0;0;0;0;0;0;0;0;0;0;0;0;0;0;0;0;0;0;0;0;0;0;0;0;0;0;0;0;0;0;0;0;0;0;0;0;0;0;0;0;0;0;0;0;0;0;0;0;0;0;0;0;0;0;0;0;0;0;0;0;0;0;0;0;0;0;0;0;0;0;0;0;0;0;0;0;0;0;0;0;0;0;0;0;0;0;0;0;0;0;0;0;0;0;0;0;0;0;0;0;0;0;0;0;0;0;0;0;0;0;0;0;0;0;0;0;0;0;0;0;0;0;0;0;0;0;0;0;0;0;0;0;0;0;0;0;0;0;0;0;0;0;0;0;0;0;0;0;0;0;0;0;0;0;0;0;0;0;0;0;0;0;0;0;0;0;0;0;0;0;0;0;0;0;0;0;0;0…
pftu;Pfaffia tuberosa;Hicken;0;0;0;0;0;0;0;0;0;0;0;0;0;0;0;0;0;0;0;0;0;0;0;0;0;0;0;0;0;0;0;0;0;0;0;0;0;0;0;0;0;0;0;0;0;0;0;0;0;0;0;0;0;0;0;0;0;0;0;0;0;0;0;0;0;0;0;0;0;0;0;0;0.025;0;0;0;0;0;0;0;0;0;0;0;0;0;0;0;0;0;0;0;0;0;0;0;0;0;0;0;0;0;0;0;0;0;0;0;0;0;0;0;0;0;0;0;0;0;0;0;0;0;0;0;0;0;0;0;0;0;0;0;0;0;0;0;0;0;0;0;0;0;0;0;0;0;0;0;0;0;0;0;0;0;0;0;0;0;0;0;0;0;0;0;0;0;0;0;0;0;0;0;0;0;0;0;0;0;0;0;0;0;0;…
phin;Phalaris caroliniana;Walter;0;0;0;0;0;0;0;0;0;0;0;0;0;0;0;0;0;0;0;0;0;0;0;0;0;0;0;0;0;0;0;0;0;0;0;0;0;0;0;0;0;0;0;0;0;0;0;0;0;0;0;0;0;0;0;0;0;0;0;0;0;0;0;0;0;0;0;0;0;0;0;0;0;0;0;0;0;0;0;0;0;0;0;0;0;0;0;0;0;0;0;0;0;0;0;0;0;0;0;0;0;0;0;0;0;0;0;0;0;0;0;0;0;0;0;0;0;0;0;0;0;0;0.025;0;0;0;0;0;0;0;0;0;0;0;0;0;0;0;0;0;0;0;0;0;0;0;0;0;0;0;0;0;0;0;0;0;0;0;0;0;0;0;0;0;0;0;0;0;0;0;0;0;0;0;0;0;0;0;0.01;0…
pimo;Piptochaetium montevidense;(Spreng.) Parodi;0;0.01;0;0;0;0;0;0;0;0;0.15;0;0.15;0.37;0;0;0.37;0.15;0.62;0.37;0.37;0.37;0.025;0.025;0.37;0;0.37;0.15;0.37;0.62;0;0.025;0;0;0;0;0;0;0;0;0;0;0;0;0;0;0;0;0;0;0;0;0;0;0;0;0;0;0;0;0;0.025;0;0;0;0;0;0;0;0;0;0;0;0;0;0;0;0;0;0;0;0.01;0.15;0.025;0.025;0;0.025;0;0.025;0;0;0.025;0;0.025;0;0.025;0;0.37;0.15;0.37;0.025;0.025;0;0;0;0.025;0;0;0.37;0.025;0.37;0.…
pist;Piptochaetium stipoides;(Trin. & Rupr.) Hack. ex Arechav.;0;0;0;0;0;0.025;0;0;0;0;0;0;0;0;0;0;0;0;0;0;0;0;0;0;0;0;0;0;0;0;0.37;0;0.025;0.15;0.15;0.37;0.025;0;0;0;0;0;0;0;0;0;0.37;0;0;0.025;0.15;0.025;0.15;0.62;0;0;0;0;0;0;0;0;0;0;0;0;0.025;0;0.37;0;0.37;0.62;0.025;0.37;0;0.37;0.15;0.62;0.025;0.01;0;0;0;0;0;0;0;0;0;0;0;0;0;0;0;0;0;0;0.15;0;0;0;0;0;0;0;0;0;0;0;0;0;0;0;0;0;0;0;0;0;0;0;0;0;0;0;0…
plla;Plantago lanceolata;L.;0;0;0;0;0;0;0;0;0;0;0;0;0;0;0;0;0;0;0;0;0;0;0;0;0;0;0;0;0;0;0;0;0;0;0;0;0;0;0;0;0;0;0;0;0;0;0;0;0;0;0;0;0;0;0;0;0;0;0;0;0;0;0;0;0;0;0;0;0;0;0;0;0;0;0;0;0;0;0;0;0;0.025;0;0.15;0;0;0;0;0;0;0;0;0;0;0;0;0;0;0;0;0;0;0;0;0;0;0;0;0;0;0;0;0;0;0;0;0;0;0;0;0;0;0;0;0;0;0;0;0;0;0;0;0;0;0;0;0;0;0;0;0;0;0;0;0;0;0;0;0;0;0;0;0;0;0;0;0;0;0;0;0;0;0;0;0;0;0;0;0;0;0;0;0;0;0;0;0;0;0;0;0;0;…
plmy;Plantago myosuros;Lam.;0;0;0;0;0;0;0;0;0;0;0;0;0;0;0;0;0;0;0;0;0;0;0;0;0;0;0;0;0;0;0;0;0.15;0;0;0;0;0;0;0;0;0;0;0;0;0;0;0;0;0;0;0;0;0;0;0;0;0;0;0;0;0;0;0;0;0;0;0;0;0;0;0;0;0;0;0;0;0;0;0;0;0;0.15;0;0;0;0;0;0;0.025;0;0.025;0;0;0;0;0;0.025;0.025;0;0;0.15;0;0;0;0;0;0;0;0;0;0;0;0;0.15;0;0;0.025;0;0.025;0;0;0.025;0;0;0.025;0;0;0;0;0;0;0.15;0;0;0;0.37;0.025;0.025;0;0.025;0;0;0;0;0;0;0.025;0.025;0.0…
pasp;Plantago sp.;;0;0;0;0.025;0;0;0;0;0.01;0;0;0;0;0;0;0.15;0;0;0;0;0.025;0.025;0;0;0;0.025;0;0;0;0.025;0;0.025;0;0;0;0;0;0;0;0;0;0;0;0;0;0.01;0;0;0;0;0;0.025;0;0;0;0;0.025;0;0;0;0;0;0;0;0;0;0;0;0;0;0.01;0;0;0;0.01;0;0;0;0;0.01;0;0;0;0;0;0;0;0;0;0;0;0;0;0;0;0;0;0;0;0;0;0;0;0;0;0;0;0;0;0;0;0;0;0;0;0;0;0;0;0;0;0;0;0;0;0;0;0;0;0;0;0;0;0;0;0;0;0;0;0;0;0;0;0;0;0;0;0;0;0;0;0;0;0;0;0;0;0;0;0;0;0;0;0;0;…
plto;Plantago tomentosa;Lam.;0;0;0;0;0;0;0;0;0;0;0;0;0;0;0;0;0;0;0;0;0;0;0;0;0;0;0;0;0;0;0;0;0;0;0;0;0;0;0;0;0;0;0;0;0;0;0;0;0;0;0;0;0;0;0;0;0;0;0;0;0;0;0;0;0;0;0;0;0;0;0;0;0;0;0;0;0;0;0;0;0;0;0;0;0;0;0;0;0;0;0;0;0;0;0;0;0;0;0;0;0;0;0;0;0;0;0;0;0;0;0;0;0;0;0;0;0;0;0.15;0;0;0;0;0;0;0;0;0;0;0;0;0;0;0;0;0;0;0;0;0;0;0;0;0;0;0;0;0;0;0;0;0;0;0;0;0;0;0;0;0;0;0;0;0;0;0;0;0;0;0;0;0;0;0;0;0;0;0;0;0;0;0;0;0…
plsa;Pluchea sagittalis;(Lam.) Cabrera;0;0;0;0;0;0;0;0;0;0;0;0;0;0;0;0;0;0;0;0;0;0;0;0;0;0;0;0;0;0;0;0;0;0;0;0;0;0;0;0;0;0;0;0;0;0;0;0;0;0;0;0;0;0;0;0;0;0;0;0;0;0;0;0;0;0;0;0;0;0;0;0;0;0;0;0;0;0;0;0;0;0;0;0;0;0;0;0;0;0;0;0;0;0;0;0;0;0;0;0;0;0;0;0;0;0;0;0;0;0;0;0;0;0;0;0;0;0;0;0;0;0;0;0;0;0;0;0;0;0;0;0;0;0;0;0;0;0;0;0;0;0;0;0;0;0;0;0;0;0;0;0;0;0;0;0;0;0;0;0;0;0;0;0;0;0;0;0;0;0;0;0;0;0;0;0;0;0;0;0;…
chpo;Chascolytrum poomorphum;(J. Presl) L. Essi	Longhi-Wagner & Souza-Chies;0;0;0;0;0;0;0;0;0;0;0;0;0;0;0;0;0;0;0;0;0;0;0;0;0;0;0;0;0;0;0;0;0;0;0;0;0;0;0;0;0;0;0;0;0;0;0;0;0;0;0;0;0;0;0;0;0;0;0;0;0;0;0;0;0;0;0;0;0;0;0;0;0;0;0;0;0;0;0;0;0;0;0;0;0;0;0;0;0;0;0;0;0;0;0;0;0;0;0;0;0;0;0;0;0;0;0;0;0;0;0;0;0;0;0;0;0;0;0;0;0;0;0;0;0;0;0;0;0;0;0.025;0;0;0;0;0;0;0;0;0;0;0;0;0;0;0;0;0;0;0.025;0;0;0;0;0;0;0;0;0;0;0;0;0;0;0;0;0;0;0;0;0;0;0;0;0;0;0;0;0;0;0;0…
pomo;Polygala molluginifolia;A. St.-Hil. & Moq.;0;0;0;0;0;0;0;0;0;0.025;0.15;0;0.025;0;0.01;0.01;0.025;0;0;0;0;0;0;0;0;0;0;0;0;0;0;0;0;0;0;0;0;0;0;0;0;0;0;0;0;0.01;0;0;0;0;0;0;0;0;0;0;0;0;0;0;0;0;0;0;0.01;0;0;0;0;0;0;0;0;0;0;0;0;0;0;0;0.025;0;0;0;0;0;0;0;0;0;0.01;0;0;0;0;0;0;0;0;0;0;0;0;0;0;0;0;0;0;0;0;0;0;0;0;0;0;0;0;0;0;0;0;0;0;0;0;0;0;0;0;0;0;0;0;0;0;0;0;0;0;0;0;0;0;0.01;0;0;0;0;0;0;0;0;0;0;0;…
ptsp;Pteridium sp.;Gled. ex Scop.;0;0;0;0;0;0;0;0;0;0;0;0;0;0;0;0;0;0;0;0;0;0;0;0;0;0;0;0;0;0;0;0;0;0;0;0;0;0;0;0;0;0;0;0;0;0;0;0;0;0;0;0;0;0;0;0;0;0;0;0;0;0;0;0;0;0;0;0;0;0;0;0;0;0;0;0;0;0;0;0;0;0;0;0;0;0;0;0;0;0;0;0;0;0;0;0;0;0;0;0;0;0;0;0;0;0;0;0;0;0;0;0;0;0;0;0;0;0;0;0;0;0;0;0;0;0;0;0;0;0;0;0;0;0;0;0;0;0;0;0;0;0;0;0;0;0;0;0;0;0;0;0;0;0;0;0;0;0;0;0;0;0;0;0;0;0;0;0;0;0;0;0;0;0;0;0;0;0;0;0;0;0;0…
ptal;Pterocaulon alopecuroides;(Lam.) DC.;0;0;0;0;0;0;0;0;0;0;0;0;0;0;0;0;0;0;0;0;0;0;0;0;0;0;0;0;0;0;0;0;0;0;0;0;0;0;0;0;0;0;0;0;0;0;0;0;0;0;0;0;0;0;0;0;0;0;0;0;0;0;0;0;0;0;0;0;0;0;0;0;0;0;0;0;0;0;0;0;0;0;0;0;0;0;0;0;0;0;0;0;0;0;0;0;0;0;0;0;0;0;0;0;0;0;0;0;0;0;0;0;0;0;0;0;0;0;0;0;0;0;0;0;0;0;0;0;0;0;0;0;0;0;0;0;0;0;0;0;0;0;0;0;0;0;0;0;0;0;0;0;0;0;0;0;0;0;0;0;0;0;0;0;0;0;0;0;0;0;0;0;0;0;0;0;0;0;0…
ptpo;Pterocaulon polypterum;(DC.) Cabrera;0;0;0;0;0;0;0;0;0;0;0;0;0;0;0;0;0;0;0;0;0;0;0;0;0;0;0;0;0;0;0;0;0;0;0;0;0;0;0;0;0;0;0;0;0;0;0;0;0;0;0;0;0;0;0;0;0;0;0;0;0;0;0;0;0;0;0;0;0;0;0;0;0;0;0;0;0;0;0;0;0;0;0;0;0;0;0;0;0;0;0;0;0;0;0;0;0;0;0;0;0;0;0;0;0;0;0;0;0;0;0;0;0;0;0;0;0;0;0;0;0;0;0;0;0;0;0;0;0;0;0;0;0;0;0;0;0;0;0;0;0;0;0;0;0;0;0;0;0;0;0;0;0;0;0;0;0;0;0;0;0;0;0;0.025;0;0;0;0;0;0;0;0;0.025;0;0…
rhpr;Rhynchospora praecinctha;;0;0;0;0;0;0;0;0;0;0;0;0;0.15;0;0;0;0;0.15;0;0.025;0.15;0;0.87;0.87;0.025;0.37;0;0.025;0.62;0;0;0.025;0.37;0;0.15;0;0;0;0;0;0.01;0;0.15;0;0;0.15;0.37;0.37;0.37;0.62;0;0;0.37;0.15;0;0;0;0;0;0;0;0;0;0.37;0.37;0;0.87;0.37;0.37;0.37;0.37;0.15;0;0.15;0.01;0;0;0.15;0.025;0.025;0.15;0;0;0;0;0;0;0;0;0;0;0;0;0;0;0;0;0;0;0;0;0;0;0;0;0;0;0;0;0;0;0;0;0;0;0;0;0;0;0;0;0;0;0;0;0;0;…
rhsp;Rhynchospora sp.;;0;0;0;0;0;0;0;0;0;0;0;0;0;0;0;0;0;0;0;0;0;0;0;0;0;0;0;0;0;0;0;0;0;0;0;0;0;0;0;0;0;0;0;0;0;0;0;0;0;0;0;0;0;0;0;0;0;0;0;0;0;0;0;0;0;0;0;0;0;0;0;0;0;0;0;0;0;0;0;0;0;0;0;0;0;0;0;0;0;0;0;0;0;0.15;0.15;0;0;0.01;0;0.15;0;0;0;0.025;0.62;0;0;0;0.025;0.37;0.025;0.15;0.37;0.37;0;0;0;0;0;0;0.025;0;0.025;0;0;0;0;0;0.025;0;0;0;0;0.15;0;0;0;0.025;0;0;0;0;0;0.025;0.025;0.15;0.025;0;0.025;0…
ribr;Richardia brasiliensis;Gomes;0;0;0;0;0;0;0;0;0;0;0;0;0;0;0;0;0;0.025;0;0;0;0;0;0;0;0;0;0;0;0;0;0;0;0;0;0;0;0;0;0;0;0;0;0;0;0;0;0;0;0;0;0;0;0;0;0;0;0;0;0;0;0;0;0;0;0;0;0;0;0;0;0;0;0;0;0.025;0.025;0;0;0;0;0;0;0;0;0;0;0;0;0;0;0;0;0;0;0;0;0;0;0.01;0;0;0;0;0;0;0;0;0;0;0;0;0;0;0;0;0;0;0;0;0;0;0;0;0;0;0;0;0;0;0;0;0;0;0;0;0;0;0;0;0;0;0;0;0;0;0;0;0;0;0;0;0;0;0;0;0;0;0;0;0;0;0;0;0.025;0;0;0;0;0;0;0;0;…
rihu;Richardia humistrata;(Cham. & Schltdl.) Steud.;0;0;0;0;0;0;0;0;0;0;0;0;0;0;0;0;0;0;0;0;0;0;0;0;0;0;0;0;0;0;0;0;0;0;0;0;0;0;0;0;0;0;0.01;0;0;0;0;0;0;0;0;0;0;0;0;0;0;0;0;0;0;0;0;0;0;0;0;0;0;0;0;0;0.01;0;0;0;0;0;0;0;0;0;0;0;0;0;0;0;0;0;0;0;0;0;0;0;0;0;0;0;0;0;0;0;0;0;0;0;0;0;0;0;0;0;0;0;0;0;0;0;0;0;0;0;0;0;0;0;0;0;0;0;0;0;0;0;0;0;0;0;0;0;0;0;0;0;0;0;0;0;0;0;0;0;0;0;0;0;0;0;0;0;0;0;0;0;0;0;0;0;0…
risp;Richardia sp.;;0;0;0;0;0;0;0;0;0;0.025;0;0;0;0;0.15;0;0;0;0;0;0;0;0;0;0;0;0;0;0;0;0;0;0;0;0;0;0;0;0;0;0;0;0;0;0;0;0;0;0;0;0;0;0;0;0;0;0;0;0;0;0;0;0;0;0;0;0;0;0;0;0;0;0;0;0;0;0;0;0;0;0;0;0;0.01;0;0;0;0;0.025;0;0;0.01;0.025;0;0;0.025;0;0;0;0;0.01;0;0;0;0;0;0;0.025;0;0.025;0;0;0;0;0;0;0;0;0;0;0;0;0;0;0;0;0;0;0;0;0;0;0.01;0.025;0;0.025;0;0;0.15;0;0;0;0;0;0;0;0;0;0;0;0.025;0;0;0;0;0;0;0.025;0;0;0…
rist;Richardia stellaris;(Cham. & Schltdl.) Steud.;0;0;0;0;0;0;0;0;0;0;0;0;0;0;0;0;0;0;0;0;0;0;0;0;0;0;0.01;0.025;0;0;0;0;0;0;0;0;0;0;0;0;0;0;0;0;0;0;0;0;0;0;0;0;0;0;0;0;0;0;0;0;0;0;0;0;0;0;0;0;0;0;0;0;0;0;0;0;0;0;0;0;0;0;0;0;0;0;0;0;0;0;0;0;0;0;0;0;0;0;0;0;0;0;0;0;0;0;0;0;0;0;0;0;0;0;0;0;0;0;0;0;0;0;0;0;0;0;0;0;0;0;0;0;0;0;0;0;0;0;0;0;0;0;0;0;0;0;0;0;0;0;0;0;0;0;0;0;0;0;0;0;0;0;0;0;0;0;0;0;0;0;0…
ruob;Rumex obtusifolius;L.;0;0;0;0;0;0;0;0.01;0;0;0;0;0;0;0;0;0;0;0;0;0;0;0;0;0;0;0;0;0;0;0;0;0;0;0;0;0;0;0;0;0;0;0.01;0;0;0;0;0;0;0;0;0;0;0;0;0;0;0;0;0;0;0;0;0;0;0;0;0;0;0;0;0;0;0;0;0;0;0;0;0;0;0;0;0;0;0;0;0;0;0;0;0;0;0;0;0;0;0;0;0;0;0;0;0;0;0;0;0;0;0;0;0;0;0;0;0;0;0;0;0;0;0;0;0;0;0;0;0;0;0;0;0;0;0;0;0;0;0;0;0;0;0;0;0;0;0;0;0;0;0;0;0;0;0;0;0;0;0;0;0;0;0;0;0;0;0;0;0;0;0;0;0;0;0;0;0;0;0;0;0;0;0;0;…
saan;Saccharum angustifolium;(Nees) Trin.;0;0;0;0;0;0;0;0;0;0;0;0;0;0;0;0;0;0;0;0;0;0;0;0;0;0;0;0;0;0;0;0;0;0;0;0;0;0;0;0;0;0;0;0;0;0;0;0;0;0;0;0;0;0;0;0;0;0;0;0;0;0;0;0;0;0;0;0;0;0;0;0;0;0;0;0;0;0;0;0;0;0;0;0;0;0;0;0;0;0;0;0;0;0;0;0;0;0;0;0;0;0;0;0;0;0;0;0;0;0;0;0;0;0;0;0;0;0;0;0;0;0;0;0;0;0;0;0;0;0;0;0;0;0;0;0;0;0;0;0;0;0;0;0;0;0;0;0;0;0;0;0;0;0;0;0;0;0;0;0;0;0;0;0;0;0;0;0;0;0;0;0;0;0;0;0;0;0;0…
scmi;Schizachyrium microstachyum;(Desv. ex Ham.) Roseng.	B.R. Arrill. & Izag.;0;0;0;0;0;0;0;0;0;0;0;0;0;0;0;0;0;0;0;0.37;0.025;0;0;0;0;0;0;0;0;0;0;0;0;0;0;0;0;0;0;0;0;0;0;0;0;0;0;0;0;0;0;0;0;0;0;0;0;0;0;0;0;0;0;0;0;0;0;0;0;0;0.37;0;0;0;0.62;0;0.15;0;0;0;0;0;0;0;0;0;0;0;0;0;0;0;0;0;0;0.15;0;0;0;0;0;0;0;0.15;0.025;0;0.15;0.025;0;0;0;0;0;0;0;0;0;0;0;0;0;0;0;0;0;0;0;0;0;0;0;0;0;0;0;0;0;0;0;0;0;0;0;0;0;0;0;0;0;0;0;0.62;0;0;0;0.37;0;0.025;0;0;0;0;0;0;0;0;0;0…
scra;Scutellaria racemosa;Pers.;0;0;0;0;0;0;0;0;0;0;0;0;0;0;0.01;0;0;0;0;0;0;0;0.01;0.01;0;0;0;0;0;0;0;0;0;0.01;0.01;0;0;0;0.025;0;0.025;0;0;0;0;0;0;0;0;0;0;0;0;0.025;0;0;0;0;0;0;0;0;0;0;0;0;0;0;0;0;0;0.01;0;0;0;0;0;0;0;0;0;0;0;0;0;0;0;0;0;0;0;0;0;0;0;0;0;0;0;0;0;0;0;0;0;0;0;0;0;0;0;0;0;0;0;0;0;0;0;0;0;0;0;0;0;0;0;0;0;0;0;0;0;0;0;0;0;0;0;0;0;0;0;0;0;0;0;0;0;0;0;0;0;0;0;0;0;0;0;0;0;0;0;0;0;0;0;0;0…
sebr;Senecio brasiliensis;(Spreng.) Less.;0;0;0;0;0;0;0;0;0;0;0;0;0;0;0;0;0;0;0;0;0;0;0;0;0;0;0;0;0;0;0;0;0;0;0;0;0;0;0;0;0;0;0;0;0;0;0;0;0;0;0;0;0;0;0;0;0;0;0;0;0;0;0;0;0;0;0;0;0;0;0;0;0;0;0;0;0;0;0;0;0;0;0;0;0;0;0;0;0;0;0;0;0;0;0;0;0;0;0;0;0;0;0;0;0;0;0;0;0;0;0;0;0;0;0;0;0;0;0;0;0;0;0;0;0;0;0;0;0;0;0;0;0;0;0;0;0;0;0;0;0;0;0;0;0;0;0;0;0;0;0;0;0;0;0;0;0;0;0;0;0;0;0;0;0;0;0;0;0;0;0;0;0;0;0;0;0;0;0…
sese;Senecio selloi;(Spreng.) DC.;0;0;0;0;0;0;0;0;0;0;0;0;0;0;0;0;0;0;0;0;0;0;0;0;0;0;0;0;0;0;0;0;0;0;0;0;0;0;0;0;0;0;0;0;0;0;0;0;0;0;0;0;0;0;0;0;0;0;0;0;0;0;0;0;0;0;0;0;0;0;0;0;0;0;0;0;0;0;0;0;0;0.01;0;0;0;0;0;0;0;0;0;0;0;0;0;0;0;0;0;0;0;0;0;0;0;0;0;0;0;0;0;0;0;0;0;0;0;0;0;0;0;0;0;0;0;0;0;0;0;0;0;0;0;0;0;0;0;0;0;0;0;0;0;0;0;0;0;0;0;0;0;0;0;0;0;0;0;0;0;0;0;0;0;0;0;0;0;0;0;0;0;0;0;0.025;0;0;0;0;0;…
sepa;Setaria parviflora;(Poir.) Kergu_len;0;0;0;0;0;0;0;0;0;0;0;0;0;0.025;0;0;0;0;0;0;0;0;0.025;0.025;0;0.025;0.025;0;0;0.025;0;0;0;0.01;0.025;0;0;0;0;0;0;0;0;0;0;0;0;0;0.01;0;0;0;0;0.15;0;0;0;0;0;0;0;0;0;0;0.025;0;0;0;0.01;0;0;0.025;0;0.01;0;0.15;0;0;0;0;0;0.025;0.025;0;0;0;0.025;0.025;0.025;0.025;0;0.025;0.025;0.025;0.025;0;0;0;0.025;0;0;0;0;0.025;0;0;0;0;0;0;0.025;0;0.025;0;0.025;0;0.025;0.025…
sirh;Sida rhombifolia;L.;0;0;0;0;0;0;0;0;0;0;0;0;0;0;0;0;0;0;0;0;0;0;0;0;0;0;0;0;0;0;0;0;0;0;0;0;0;0;0;0;0;0;0;0;0;0;0;0;0;0;0;0;0;0;0;0;0;0;0;0;0;0;0;0;0;0;0;0;0;0;0;0;0;0;0;0;0;0;0;0;0;0;0.025;0;0;0;0.025;0;0;0;0;0;0;0;0;0;0;0;0;0;0;0;0;0;0;0;0;0;0;0;0;0;0;0;0.01;0;0;0;0;0;0;0;0;0.025;0;0;0;0;0;0;0;0;0;0;0;0;0;0;0.025;0;0;0;0;0;0;0;0;0;0;0;0;0;0;0;0;0;0;0;0;0;0;0;0;0.025;0;0;0;0;0;0;0;0;0;0;0;0…
siga;Silene gallica;L.;0;0;0;0;0;0;0;0;0;0;0;0;0;0;0;0;0;0;0;0;0;0;0;0;0;0;0;0;0;0;0;0;0;0;0;0;0;0;0;0;0;0;0;0;0;0;0;0;0;0;0;0;0;0;0;0;0;0;0;0;0;0;0;0;0;0;0;0;0;0;0;0;0;0;0;0;0;0;0;0;0;0;0;0;0;0;0;0;0;0;0;0;0;0;0;0;0;0;0;0;0;0;0;0;0;0;0;0;0;0;0;0;0;0;0;0;0;0;0;0;0;0;0;0;0;0;0;0;0;0;0;0;0;0;0;0;0.01;0;0;0;0;0;0;0;0;0;0;0;0;0;0;0;0;0;0;0;0;0;0;0;0;0;0;0;0;0;0;0;0;0;0;0;0;0;0;0;0;0;0;0;0;0;0;0;0;0;0…
simi;Sisyrinchium micranthum;Cav.;0;0;0;0;0;0;0;0;0;0;0.025;0;0;0;0;0.15;0;0;0;0;0.025;0;0;0;0.15;0;0;0;0;0;0;0;0;0.15;0;0;0;0.025;0;0;0;0;0;0;0;0;0;0;0;0;0;0.025;0;0;0;0;0;0;0;0;0;0;0;0;0;0;0.01;0;0;0;0;0.025;0;0;0;0.025;0;0;0.01;0.025;0;0;0;0;0;0;0;0.025;0;0.025;0.37;0.15;0.025;0;0;0.025;0.15;0;0.01;0.01;0.15;0.15;0.025;0.01;0;0;0;0.025;0;0;0;0;0;0;0.15;0.37;0.01;0.025;0.025;0.025;0;0.025;0;0;0…
sipla;Sisyrinchium platense;I.M. Johnst.;0;0;0;0;0;0;0;0;0;0.15;0;0;0;0;0;0;0;0;0;0;0;0;0;0;0;0;0;0;0;0;0;0;0;0;0;0;0;0;0;0;0;0;0;0;0;0;0;0;0;0;0;0;0;0;0;0;0;0;0;0;0;0;0;0;0;0;0;0;0;0;0;0;0;0;0;0;0;0;0;0;0;0;0;0;0;0;0;0;0;0;0;0;0;0;0;0;0;0;0;0;0;0;0;0;0;0;0;0;0;0;0;0;0;0;0;0;0;0;0;0;0;0;0;0;0;0;0;0;0;0;0;0;0;0;0;0;0;0;0;0;0;0;0;0;0;0;0;0;0;0;0;0;0;0;0;0;0;0;0;0;0;0;0;0;0;0;0;0;0;0;0;0;0;0;0;0;0;0…
soco;Solanum commersonii;Dunal;0;0;0;0;0;0;0;0;0;0;0;0;0;0;0;0;0;0;0;0;0;0;0;0;0;0;0;0;0;0;0;0;0;0;0;0;0;0;0;0;0;0;0;0;0;0;0;0;0;0;0;0;0;0;0;0;0;0;0;0;0;0;0;0;0;0;0;0;0;0;0;0;0;0;0;0;0;0;0;0;0;0;0;0;0;0;0;0;0;0;0;0;0;0;0;0;0;0;0;0;0;0;0;0;0;0;0;0;0;0;0;0;0;0;0;0;0;0;0;0;0;0;0;0;0;0;0;0;0;0;0;0;0;0;0;0;0;0;0;0;0;0;0;0;0;0;0;0;0;0;0;0;0;0;0;0;0;0;0;0;0;0;0;0;0;0;0;0;0;0;0;0;0;0;0;0;0;0;0;0;0;0;0;0;…
sosi;Solanum sisymbriifolium;Lam.;0;0;0;0;0;0;0;0.01;0;0;0;0;0;0;0;0;0;0;0;0;0;0;0;0;0;0;0;0;0;0;0;0;0;0;0;0;0;0;0;0;0;0;0;0;0;0;0;0;0;0;0;0;0;0;0;0;0;0;0;0;0;0;0;0;0;0;0;0;0;0;0;0;0;0;0;0;0;0;0;0;0;0;0;0;0;0;0;0;0.025;0;0;0;0;0;0;0;0;0;0;0;0;0;0;0;0;0;0;0;0;0;0;0;0;0;0;0;0;0;0;0;0;0;0;0;0;0;0;0;0;0;0;0;0;0;0;0;0;0;0;0;0;0.025;0;0;0;0;0;0;0;0;0;0;0;0;0;0;0;0;0;0;0;0;0;0;0;0;0;0;0;0;0;0;0;0;0;0;0;…
soch;Solidago chilensis;Meyen;0;0;0;0.01;0.025;0.025;0;0.01;0.025;0.01;0;0;0.15;0;0;0;0;0.025;0;0;0;0;0;0;0;0;0;0;0;0;0;0.025;0;0.025;0;0;0;0;0;0;0;0;0;0;0;0.01;0;0.025;0;0;0;0.01;0;0;0;0;0.025;0.01;0.01;0;0;0.15;0;0;0;0.025;0;0.01;0.025;0.01;0;0;0;0;0;0.01;0;0.01;0;0;0;0.025;0;0;0;0.025;0;0;0;0;0;0;0;0;0;0;0;0;0;0;0;0;0;0;0;0;0;0;0;0;0;0;0;0.025;0;0;0;0;0;0;0;0.025;0;0.025;0;0;0;0;0;0;0;0;0;0;0;…
sose;Soliva sessilis;Ruiz & Pav.;0;0.01;0.01;0.025;0.025;0.025;0.025;0;0.15;0.025;0;0;0.025;0;0;0.025;0;0;0.025;0;0.025;0.025;0;0;0;0;0;0.025;0;0;0;0;0.01;0;0;0;0;0;0;0.025;0.025;0.025;0;0;0.025;0.01;0.01;0;0.01;0.01;0;0;0;0;0;0.025;0;0.025;0;0.025;0.025;0.025;0.025;0.62;0;0;0;0.025;0;0;0;0;0;0;0;0;0.025;0.01;0;0.01;0;0.01;0.025;0;0;0;0;0.025;0.025;0;0.025;0;0;0;0;0;0;0;0;0;0;0;0;0;0;0;0.025;0.02…
baso;bare soil;;0.62;0.62;0.37;0.37;0.62;0.62;0.62;0.37;0.62;0;0;0;0;0;0;0;0;0;0;0;0;0;0;0;0;0;0;0;0;0;0;0;0;0;0;0;0.37;0.87;0.62;0.15;0.37;0.37;0.62;0.62;0.87;0;0;0;0;0;0;0;0;0;0.62;0.62;0.62;0.62;0.37;0.37;0.15;0.62;0.62;0;0;0;0;0;0;0;0;0;0;0;0;0;0;0;0;0;0;0;0;0;0;0;0;0.15;0.025;0;0.025;0.15;0.025;0;0;0;0;0;0;0;0;0;0;0;0;0;0;0.025;0;0;0;0;0;0;0;0.025;0;0.15;0.37;0.37;0;0;0;0;0;0;0;0;0;0;0;0;0.1…
spgr;Spergula grandis;Pers.;0;0;0;0;0;0;0;0;0;0;0;0;0;0;0;0;0;0;0;0;0;0;0;0;0;0;0;0;0;0;0;0;0;0;0;0;0;0;0;0;0;0;0;0;0;0;0;0;0;0;0;0;0;0;0;0;0;0;0;0;0;0;0;0;0;0;0;0;0;0;0;0;0;0;0;0;0;0;0;0;0;0;0;0;0;0;0;0;0;0;0;0;0;0;0;0;0;0;0;0;0;0;0;0;0;0;0;0;0;0;0;0;0;0;0;0;0;0;0;0;0;0;0;0;0;0;0;0;0;0;0;0;0;0;0;0;0;0;0;0;0;0;0;0;0;0;0;0;0;0;0;0;0;0;0;0;0;0;0;0;0;0;0;0;0;0;0;0;0;0;0;0;0;0;0;0;0;0;0;0;0;0;0;0;0;0…
spve;Spermacoce verticillata;L.;0;0;0;0;0;0;0;0;0;0;0;0;0;0;0;0;0;0;0;0;0;0;0;0;0;0;0;0;0;0;0;0;0;0;0;0;0;0;0;0;0;0;0;0;0;0;0;0;0;0;0;0;0;0;0;0;0;0;0;0;0;0;0;0;0;0;0;0;0;0;0;0;0;0;0;0;0;0;0;0;0;0;0;0;0;0;0;0;0;0;0;0;0;0;0;0;0;0;0;0;0;0;0;0;0;0;0;0;0;0;0;0;0;0;0;0;0;0;0;0;0;0;0;0;0;0;0;0;0;0;0;0;0;0;0;0;0;0;0;0;0;0;0;0;0;0;0;0;0;0;0;0;0;0;0;0;0;0;0;0;0;0;0;0;0;0;0;0;0;0;0;0;0;0;0;0;0;0;0;0;0;0;0;0…
spin;Sporobolus indicus;(L.) R. Br.;0;0.025;0;0;0;0;0.15;0;0.37;0;0.15;0;0;0.37;0.37;0.15;0.15;0.15;0;0;0;0.15;0;0;0.37;0;0.15;0;0;0.15;0.025;0;0;0;0.15;0.025;0;0;0.15;0;0;0;0;0;0;0;0;0;0;0;0.01;0;0.37;0.15;0.15;0;0;0;0;0;0;0;0;0;0.025;0;0.15;0.025;0;0.025;0.025;0;0.15;0;0;0.15;0.01;0;0.15;0;0;0.025;0;0.025;0;0;0;0;0;0;0;0.025;0.15;0;0.15;0;0.025;0;0;0;0.025;0;0.37;0.025;0.15;0.025;0.025;0.15;0;0…
sthi;Steinchisma hians;(Elliott) Nash;0;0;0.025;0;0;0;0;0;0;0.37;0.15;0;0;0.15;0.37;0;0.15;0;0;0.37;0;0.025;0.025;0.025;0.15;0;0.15;0.01;0.37;0.15;0;0.025;0;0;0;0.01;0;0;0;0;0;0;0;0;0;0;0.025;0.15;0;0.15;0.15;0;0;0;0;0;0;0;0;0;0;0;0;0;0;0.025;0.01;0.025;0.01;0.15;0;0;0.025;0;0;0;0;0;0;0.025;0;0.025;0.025;0.01;0;0;0;0.15;0;0;0;0;0;0.025;0.025;0;0;0.025;0.025;0.15;0;0;0.025;0.025;0.025;0;0;0;0;0;0;…
stme;Stellaria media;(L.) Vill.;0;0;0;0;0;0;0;0;0;0;0;0;0;0;0.15;0;0;0;0;0;0;0;0;0;0;0;0;0;0;0;0;0;0;0;0;0;0;0;0;0;0;0;0;0;0;0;0;0;0;0;0;0;0;0;0;0;0;0;0;0;0;0;0;0;0;0;0;0;0;0;0;0;0;0;0;0;0;0;0;0;0;0;0;0;0;0;0;0;0;0;0;0;0;0;0;0;0;0;0;0;0;0;0;0;0;0;0;0;0;0;0;0;0;0;0;0;0;0;0;0;0;0;0;0;0;0;0;0;0;0;0;0;0;0;0;0;0;0;0;0;0;0;0;0;0;0;0;0;0;0;0;0;0;0;0;0;0;0;0;0;0;0;0;0;0;0;0;0;0;0;0;0;0;0;0;0;0;0;0;0;0;0;…
stse;Stipa setigera;J. Presl;0;0;0;0;0;0;0;0;0;0;0;0;0.15;0;0.01;0.15;0.15;0.15;0;0;0.37;0;0.37;0.37;0.37;0;0.37;0;0;0;0;0;0;0.37;0.37;0;0;0;0;0;0;0.01;0;0;0;0;0;0;0;0;0;0;0;0;0;0;0;0;0;0.025;0;0;0.025;0;0.025;0.025;0.025;0;0;0;0.62;0.37;0;0.37;0.025;0.37;0.025;0.37;0;0;0;0;0.37;0.15;0.025;0;0;0;0;0.025;0;0;0;0;0;0;0;0.025;0.15;0;0.025;0.37;0.025;0;0;0;0;0;0;0;0;0;0;0.025;0.01;0;0;0;0;0;0;0;0;0;0…
sysu;Symphyotrichum subulatum;(Michx.) G.L. Nesom;0;0;0;0;0;0;0;0;0;0;0;0;0;0;0;0;0;0;0;0;0;0;0;0;0;0;0;0;0;0;0;0;0;0;0;0.01;0;0;0;0;0;0;0;0;0;0;0;0.025;0;0;0;0;0;0;0.025;0;0;0;0;0;0;0;0;0;0;0;0;0;0;0;0;0;0;0;0;0;0;0;0;0;0;0.01;0;0;0;0;0;0;0;0;0.01;0;0;0;0;0;0.025;0;0;0;0;0;0;0;0;0;0;0;0;0;0;0;0;0;0;0;0;0;0.025;0.025;0;0;0;0;0;0;0;0;0;0;0;0;0.025;0.025;0;0;0;0;0.025;0.025;0;0;0;0;0;0;0;0.025;0;0;…
trsp;Tragia sp.;;0;0;0;0;0;0;0;0;0;0;0;0;0;0;0;0;0;0;0;0;0;0;0;0;0;0;0;0;0;0;0;0;0;0;0;0;0;0;0;0;0;0;0;0;0;0;0;0;0;0;0;0;0;0;0;0;0;0;0;0;0;0;0;0;0;0;0;0;0;0;0;0;0;0;0;0;0;0;0;0;0;0;0;0;0;0;0;0;0;0;0;0;0;0;0;0;0;0;0;0;0;0;0;0;0;0;0;0;0;0;0;0;0;0;0;0;0;0;0;0;0;0;0;0;0;0;0;0;0;0;0;0;0;0;0;0;0;0;0;0;0;0;0;0;0;0;0;0;0;0;0;0;0;0;0;0;0;0;0;0;0;0;0;0;0;0;0;0;0;0;0;0;0;0;0;0;0;0;0;0;0;0;0;0;0;0;0;0;0;0;0;…
trbr;Tridens brasiliensis;(Nees ex Steud.) Parodi;0;0;0;0;0;0;0;0;0;0;0;0;0;0;0;0;0;0;0;0;0;0;0;0;0;0;0;0;0;0;0;0;0;0;0;0;0;0;0;0;0;0;0;0;0;0;0;0;0;0;0;0;0;0;0;0;0;0;0;0;0;0;0;0;0;0;0;0;0;0;0;0;0;0;0;0;0;0;0;0;0;0;0;0;0;0;0;0;0;0;0;0;0;0;0;0;0;0;0;0;0;0;0;0;0;0;0;0;0;0;0;0;0;0;0;0;0;0;0;0;0;0;0;0;0;0;0;0;0;0;0;0;0;0;0;0;0;0;0;0;0;0;0;0;0;0;0;0;0;0;0;0;0;0;0;0;0;0;0;0;0;0;0;0;0;0;0;0;0;0;0;0;0;0;0…
trpo;Trifolium polymorphum;Poir.;0;0;0;0;0;0;0;0;0;0.15;0.025;0;0;0.15;0;0;0;0;0.025;0;0;0.01;0;0;0;0;0.62;0;0.025;0.025;0.15;0;0.01;0.15;0;0.01;0;0;0;0;0;0;0;0;0;0.025;0;0.025;0;0;0;0;0.025;0;0;0;0;0;0;0;0;0;0;0.01;0;0;0.025;0;0.15;0;0.025;0.01;0;0;0.01;0;0.025;0;0;0;0;0;0;0;0;0;0;0;0;0;0;0;0;0;0;0;0;0;0;0;0;0;0;0;0;0;0;0.15;0;0;0;0;0;0;0.025;0;0;0.025;0;0;0;0;0;0;0;0;0;0;0;0;0;0;0;0.01;0;0;0.02…
trpr;Trifolium pratense;L.;0;0;0;0;0;0;0;0;0;0;0;0;0;0;0;0;0;0;0;0;0;0;0;0;0;0;0;0;0;0;0;0;0.01;0.37;0;0;0;0;0;0;0;0;0;0;0;0;0;0;0;0;0;0;0;0;0;0;0;0;0;0;0;0;0;0;0;0;0;0;0;0;0;0;0;0;0;0;0;0;0;0;0;0;0;0;0;0;0;0;0;0;0;0;0;0;0;0;0;0;0;0;0;0;0;0;0;0;0;0;0;0;0;0;0;0;0;0;0;0;0;0;0;0;0;0;0;0;0;0;0;0;0;0;0;0;0;0;0;0;0;0;0;0;0;0;0;0;0;0;0;0;0;0;0;0;0;0;0;0;0;0;0;0;0;0;0;0;0;0;0;0;0;0;0;0;0;0;0;0;0;0;0;0;0;…
trre;Trifolium repens;L.;0.15;0.025;0.025;0.025;0.025;0.025;0.025;0;0.15;0.15;0.025;0;0.15;0.15;0;0.025;0.01;0.025;0;0;0;0;0;0;0;0;0;0.025;0.025;0.025;0.025;0;0.01;0.025;0.025;0.15;0.025;0.025;0.025;0.15;0.025;0.15;0;0.025;0.01;0;0;0;0;0;0;0;0;0;0;0.15;0.025;0.15;0.15;0.025;0.01;0.025;0.025;0;0;0;0;0;0;0;0;0;0.025;0;0.01;0.025;0.025;0.025;0.025;0.62;0.025;0;0;0;0;0;0;0;0;0;0;0;0;0;0;0;0;0;0;0;0;0…
trsp;Trifolium sp.;;0;0;0;0;0;0;0;0;0;0;0;0;0;0;0;0;0;0;0;0;0;0;0;0;0;0;0;0;0;0;0;0;0;0;0;0;0;0;0;0;0;0;0;0;0;0;0;0;0;0;0;0;0;0;0;0;0;0;0;0;0;0;0;0;0;0;0;0;0;0;0;0;0;0;0;0;0;0;0;0;0;0;0;0;0;0;0;0;0;0;0;0;0;0;0;0;0;0;0;0;0;0;0;0;0;0;0;0;0;0;0;0;0;0;0;0;0;0;0;0;0;0;0;0;0;0;0;0;0;0;0;0;0;0;0;0;0;0;0;0;0;0;0;0;0;0;0;0;0;0;0;0;0;0;0;0;0;0;0;0;0;0;0;0;0;0;0;0;0;0;0;0;0;0;0;0;0;0;0;0;0;0;0;0;0;0;0;0;0;0…
veli;Verbena litoralis;Kunth;0;0;0;0;0;0;0;0;0;0;0;0;0;0.15;0;0;0;0;0;0;0;0.01;0;0;0.025;0;0;0;0;0;0;0;0;0;0;0;0;0;0;0;0;0;0;0;0;0;0;0;0;0;0.01;0;0;0;0;0;0;0;0;0;0;0;0;0;0;0;0;0;0;0;0;0;0;0;0;0;0;0;0;0;0;0;0;0;0;0;0;0;0;0;0;0;0;0;0;0;0;0;0;0.01;0.01;0;0;0;0;0.025;0;0;0;0;0;0;0;0;0;0;0;0;0;0;0;0;0;0;0;0;0;0;0;0.025;0;0;0;0;0;0;0;0;0;0;0;0;0;0;0;0;0;0;0;0;0;0;0;0;0;0;0;0;0;0;0;0;0.01;0;0.025;0.025;…
venu;Vernonanthura nudiflora;(Less.) H. Rob.;0;0;0;0;0;0;0;0;0;0;0;0;0;0;0;0;0;0;0;0;0;0;0;0;0;0;0;0;0;0;0;0;0;0;0;0;0;0;0;0;0;0;0;0;0;0;0;0;0;0;0;0;0;0;0;0;0;0;0;0;0;0;0;0;0;0;0;0;0;0;0;0;0;0;0;0;0;0;0;0;0;0.01;0;0;0;0;0;0;0;0;0;0;0;0;0;0;0.025;0;0;0;0;0;0;0;0;0;0;0;0;0;0;0;0;0;0;0;0;0;0;0;0;0;0;0;0;0;0;0;0;0;0;0;0;0;0;0;0;0;0;0;0;0;0;0;0;0;0;0;0;0;0;0;0;0;0;0;0;0;0;0;0;0;0;0;0.025;0;0;0;0;0;0;0…
vigr;Vicia graminea;Sm.;0;0;0;0;0;0;0;0;0;0;0;0;0;0;0;0;0;0;0;0.37;0;0;0;0;0;0.15;0;0;0;0;0;0;0;0.025;0;0;0;0;0;0;0;0;0;0;0;0.37;0;0;0.025;0;0.01;0;0;0.15;0;0;0;0;0;0;0;0;0;0;0;0;0;0;0;0;0;0;0;0;0;0;0;0;0;0;0;0;0;0;0;0;0;0;0;0;0;0;0;0;0;0;0;0;0;0;0;0;0;0;0;0;0;0;0;0;0;0;0;0;0;0;0;0;0;0;0;0;0;0;0;0;0;0;0;0;0;0;0;0;0;0;0;0;0;0;0;0;0;0;0;0;0;0;0;0;0;0;0;0;0;0;0;0;0;0;0;0;0;0;0;0;0;0;0;0;0;0;0;0;0;0;…
visa;Vicia sativa;L.;0;0;0;0;0;0;0;0;0;0;0;0;0;0;0;0;0;0;0;0;0;0;0;0;0;0;0;0;0;0;0;0;0.01;0;0;0;0;0;0;0;0;0;0;0;0;0;0;0;0;0;0;0;0;0;0;0;0;0;0;0;0;0;0;0;0;0;0;0;0;0;0;0;0;0;0;0;0;0;0;0;0;0;0;0;0;0;0;0;0;0;0;0;0;0;0;0;0;0;0;0;0;0;0;0;0;0;0;0;0;0;0;0;0;0;0;0;0;0;0;0;0;0;0;0;0;0;0;0;0;0;0;0;0;0;0;0;0;0;0;0;0;0;0;0;0;0;0;0;0;0;0;0;0;0;0;0;0;0;0;0;0;0;0;0;0;0;0;0;0;0;0;0;0;0;0;0;0;0;0;0;0;0;0;0;0;0;0;0…
vuau;Vulpia australis;(Nees ex Steud.) C.H. Blom;0;0;0;0;0;0;0;0;0;0;0;0;0;0;0;0;0;0;0;0;0;0;0;0;0;0;0;0;0;0;0;0;0;0;0;0;0;0;0;0;0;0;0;0;0;0;0;0;0;0;0;0;0;0;0;0;0;0;0;0;0;0;0;0;0;0;0;0;0;0;0;0;0;0;0;0;0;0;0;0;0;0;0;0;0;0;0;0;0;0;0;0;0;0;0;0;0;0;0;0;0;0;0;0;0;0;0;0;0;0;0;0;0;0;0;0;0;0;0;0;0;0;0;0;0;0;0;0;0;0;0;0;0;0;0;0;0;0;0;0;0;0;0;0;0;0;0;0;0;0;0;0;0;0;0;0;0;0;0;0;0;0;0;0;0;0;0;0;0;0;0;0;0;0;0;…
vumy;Vulpia myuros;(L.) C.C. Gmel.;0;0;0;0;0;0;0;0;0;0;0;0;0;0;0;0;0;0;0;0;0;0;0;0;0;0;0;0;0;0;0;0;0;0;0;0;0;0;0;0;0;0;0;0;0;0;0;0;0;0;0;0;0;0;0;0;0;0;0;0;0;0;0;0;0;0;0;0;0;0;0;0;0;0;0;0;0;0;0;0;0;0;0;0;0;0;0;0;0;0;0;0;0;0;0;0;0;0;0;0.025;0;0;0;0;0;0;0;0;0;0;0;0;0;0;0;0;0.01;0;0;0;0.37;0.025;0;0;0;0;0;0;0;0;0;0.15;0.025;0;0;0;0;0;0;0;0;0;0;0;0;0;0;0.025;0;0.01;0;0;0;0;0;0;0;0;0;0;0;0;0;0;0;0;0;0;…
vusp;Vulpia sp.;;0;0;0;0;0;0;0;0;0;0;0;0;0;0;0;0;0;0;0;0;0;0;0;0;0;0;0;0;0;0;0;0;0;0;0;0;0;0;0;0;0;0;0;0;0;0;0;0;0;0;0;0;0;0;0;0;0;0;0;0;0;0;0;0;0;0;0;0;0;0;0;0;0;0;0;0;0;0;0;0;0;0;0;0;0;0;0;0;0;0;0;0;0;0;0;0;0;0;0;0;0;0;0;0;0;0;0;0;0;0;0;0;0;0;0;0;0;0;0;0;0;0;0;0;0;0;0;0;0;0;0;0;0;0;0;0;0;0;0;0;0;0;0;0;0;0;0;0;0;0;0;0;0;0;0;0;0;0;0;0;0;0;0;0;0;0;0;0;0;0;0;0;0;0;0;0;0;0;0;0;0;0;0;0;0;0;0;0;0;0;0;…
